1 **Social interaction and network structure in groups of *Drosophila* males are shaped by prior social**  
2 **experience and group composition**

3 Assa Bentzur\*<sup>1</sup>, Shir Ben-Shaanan\*<sup>1</sup>, Jennifer Benishou<sup>1</sup>, Eliezer Costi<sup>1</sup>, Amiyaal Ilany<sup>1</sup> and Galit Shohat-Ophir<sup>1,2</sup>

4

5

6 <sup>1</sup>The Mina & Everard Goodman Faculty of Life Sciences, Bar-Ilan University, Ramat-Gan, Israel

7 <sup>2</sup>The Leslie and Susan Gonda Multidisciplinary Brain Research Center, Bar-Ilan University, Ramat-Gan, Israel

8 \*Authors contributed equally to this work

9

10

11 Correspondence should be addressed to G.S.O. ([galit.ophir@biu.ac.il](mailto:galit.ophir@biu.ac.il)) or A.I. ([amiyaal.ilany@biu.ac.il](mailto:amiyaal.ilany@biu.ac.il))

12

13

## 14 **Summary**

15 Living in a group creates a complex and dynamic environment in which the behavior of the individual is influenced  
16 by and affects the behavior of others. Although social interactions and group living are fundamental adaptations  
17 exhibited by many organisms, relatively little is known about how prior social experience, internal states and group  
18 composition shape behavior in a group, and the neuronal and molecular mechanisms that mediate it. Here we present  
19 a practical framework for studying the interplay between social experience and group interaction in *Drosophila*  
20 *melanogaster* and show that the structure of social networks and group interactions are sensitive to group composition  
21 and individuals' social experience. We simplified the complexity of interactions in a group using a series of  
22 experiments in which we controlled the social experience and motivational states of individuals to dissect patterns  
23 that represent distinct structures and behavioral responses of groups under different social conditions. Using high-  
24 resolution data capture, machine learning and graph theory, we analyzed 60 distinct behavioral and social network  
25 features, generating a comprehensive representation ("group signature") for each condition. We show that social  
26 enrichment promotes the formation of a distinct group structure that is characterized by high network modularity,  
27 high inter-individual and inter-group variance, high inter-individual coordination, and stable social clusters. Using  
28 environmental and genetic manipulations, we show that this structure requires visual and pheromonal cues, and that  
29 cVA sensing neurons are necessary for the expression of different aspects of social interaction in a group. Finally,  
30 we explored the formation of group behavior and structure in heterogenous groups composed of flies with distinct  
31 internal states, and discovered evidence suggesting that group structure and dynamics reflect a level of complexity  
32 that cannot be explained as a simple average of the individuals that constitute it. Our results demonstrate that fruit  
33 flies exhibit complex and dynamic social structures that are modulated by the experience and composition of different  
34 individuals within the group. This paves the path for using simple model organisms to dissect the neurobiology of  
35 behavior in complex social environments.

36

## 37 Introduction

38 Many species have adapted to living in groups, from simple organisms, such as nematodes, to humans. Group  
39 living takes different forms with various levels of complexity, from almost random interactions to fully synchronized  
40 collective behavior<sup>1-5</sup>, and can be described by measuring the behavior of individuals, the interaction between  
41 individuals and the resulting social network, altogether defined here as “group behavior”. When individuals interact  
42 in a group, their previous experience, motivation and physiological state (termed here as internal state) affect their  
43 action selection, giving rise to diverse activity levels, behavioral responses, and engagement with others<sup>6-8</sup>. This  
44 results in a highly complex and ever changing environment, where each interaction can change the social context of  
45 subsequent interactions, leading to a variety of behavioral outcomes from what seem to be identical starting  
46 conditions<sup>7,9</sup>. The complex nature of this environment<sup>7,9</sup> imposes conceptual challenges in the quantification and  
47 analysis of group behavior<sup>10</sup>.

48 A fundamental question in this respect is how internal and external factors such as previous social experience,  
49 specific group composition or the existence of available resources, shape group behavior<sup>11,12</sup>. Although much is  
50 known about the interplay between social experience, internal states<sup>13-18</sup> and their effects on social interaction in pairs  
51 of animals<sup>14,19-23</sup>, relatively little is known about how these elements shape social behavior in a group. Currently,  
52 group behavior is mainly studied at two organizational levels: the behavioral repertoires of individuals within groups,  
53 and the structure and dynamics of all interactions within a group (social network analysis)<sup>24</sup>. Both lines of study  
54 progressed substantially with advances in machine vision and machine learning technologies that allow automated  
55 tracking and unbiased behavioral analysis<sup>25-31</sup>. Analyzing the behavioral repertoires of individuals within a group  
56 can provide a comprehensive description of behavioral responses of all individuals under different conditions,  
57 enabling the dissection of mechanisms that shape each behavior, the sensory requirements for a given behavior and  
58 the specific context it is presented in. However, this approach does not provide much information about group  
59 structure. By evaluating every interaction between pairs of individuals in a group, network analysis can be used to  
60 represent integrated systems such as social groups, providing insights into the formation, dynamics, and function of  
61 group structure<sup>24,32-34</sup>. This type of analysis can be employed to investigate transmission processes in groups as a  
62 basis for understanding complex phenomena such as microbe transmission, social grooming, decision making, and  
63 hierarchy<sup>3,32,35-47</sup>. Although analysis of individual behaviors and social networks highlight different aspects of social  
64 interaction, they are complementary for understanding complex emergent phenomena such as group behavior.

65 Studies of social interaction in *Drosophila melanogaster* have mainly focused on understanding the neuronal  
66 basis of innate and recognizable behaviors such as male–male aggression and male–female courtship encounters<sup>48–</sup>  
67 <sup>53</sup>. Various studies provided mechanistic understanding of these complex behaviors, demonstrating that their  
68 expression requires multi-sensory inputs, as well as specific neuronal pathways in the brain<sup>52,54–59</sup>. Modulation of  
69 behavior by previous social experience was also investigated in flies, revealing that gene regulation in specific  
70 neuronal populations can lead to long-lasting behavioral changes<sup>20,60–64</sup>. The social behavior of *D. melanogaster* in  
71 the wild remains largely understudied. Nonetheless, it was shown that wild flies are relatively stationary, moving

72 only a few meters a day, tending to group with conspecifics while avoiding flies of different species<sup>65</sup>. These  
73 aggregations seem to be plastic and dynamic and facilitate mating with members of other groups to decrease  
74 inbreeding. Aggregations are a substrate for a rich repertoire of social interaction that includes courtship, competition  
75 over mating partners, mating and communal oviposition<sup>65</sup>. Sex-specific adaptations for space-use were suggested,  
76 possibly driven by avoidance of predators, parasites, or males<sup>66</sup>.

77 While *Drosophila* proves to be a useful model organism for mechanistic dissection of complex behaviors<sup>67,68</sup>,  
78 only a small number of studies examined social interaction in groups of flies. These studies demonstrated that flies  
79 possess the neuronal ability to recognize different individuals in a group<sup>69</sup>, that groups of flies exhibit non-random  
80 group structures which depend on certain sensory systems<sup>4,59,70</sup> and group size<sup>71</sup>, and that group interaction facilitates  
81 collective responses to threats<sup>4,72</sup>. These findings, together with the existence of dedicated circuits for processing  
82 social information, and evidence for the presence of social aggregates in wild flies, support the notion that group  
83 living is a fundamental component of *Drosophila* behavior. Still, little is known about how group behavior in  
84 *Drosophila* unfolds under different biological and environmental conditions. Specifically, it is not clear whether flies  
85 form groups with different structures under various conditions, whether the group is affected by internal properties  
86 of its constituting individuals and their composition, by different environmental conditions, and whether individual  
87 recognition plays a role in such groups.

88 To bridge these gaps, we searched for conditions that can facilitate the formation of distinct group behaviors.  
89 We hypothesized that groups composed of flies with different social histories such as flies that were socially raised  
90 and flies that were socially isolated, will exhibit distinct emergent group structures that result from differences in  
91 motivation, experience, activity level, and/or sensory sensitivity of the interacting flies. To analyze the emergent  
92 group properties, we established an experimental framework that clusters various behavioral and social network  
93 parameters into behavioral “group signatures”. We presumed the group signature of socially raised flies to reflect a  
94 snapshot of established relationships between members of the group that developed over the course of the experience  
95 phase, while that of solitary flies to reflect initial interaction of flies that are exposed for the first time to other flies.  
96 Additionally, studies from various animal species<sup>21,22,73–75</sup> including *Drosophila* have shown that isolation results in  
97 increased activity/arousal, increased aggression and in some cases social avoidance. Extending these findings to  
98 group context, we predicted groups of solitary flies to exhibit increased activity, increased aggression and reduced  
99 social interaction. In contrast, groups of socially raised flies were predicted to show increased social interaction due  
100 to reduced aggression<sup>76,77</sup>. Here we show that social experience can drive the formation of groups with distinct  
101 behavior and network structures, and that group signature is a useful tool for simplifying the analysis of the  
102 multifaceted repertoire of parameters associated with social interaction in groups. Moreover, we show that the group  
103 signature of socially raised flies is strongly influenced by both visual cues and the sensing of the male-specific  
104 pheromone 11-cis-vaccenyl acetate (cVA). Finally, we explored social interactions in heterogenous groups and  
105 identified clusters of features that are sensitive to increasing ratios of aggressive flies, some of which reveal that  
106 inter-individual coordination depends on group composition.

## 107 **Results**

108

### 109 **Establishing a data capture and analysis pipeline for studying complex behavior in groups**

110 To explore the interplay between social history, internal states and social group interaction, we exposed male  
111 flies to distinct social conditions and recorded their social interactions within circular arenas that are suitable for  
112 analyzing complex group behavior (Fly Bowl system)<sup>78</sup>. To quantify and analyze the behavioral repertoire of  
113 individual flies, group interaction, and the resulting social networks, we adapted the Fly Bowl suite of tracking and  
114 behavior analysis tools (Ctrax, JAABA, and JAABA plot, Fig. 1A)<sup>78-80</sup>. Although Ctrax is successfully used in many  
115 behavioral setups its output includes some tracking errors such as unifying identities and failure to recognize a fly  
116 for several frames, impeding analysis that requires accurate and stable identities throughout the experiment. To  
117 resolve this, we developed a secondary processing algorithm for Ctrax output data, named FixTRAX. FixTRAX uses  
118 a set of rules to find tracking errors, calculates statistical scores that determine which identities to correct per frame,  
119 and generates a graphical summary of tracking quality per movie (detailed explanation of the algorithm, error rate  
120 and code are found in the methods section and supplementary FixTRAX files). Corrected output data are used to  
121 calculate kinetic features and classify eight distinct complex behaviors using the supervised machine learning  
122 algorithm JAABA<sup>78</sup> (Fig. 1A; full description in Supplementary Table S1).

123 We used the following requirements for an interaction: (1) Consistent with basic interaction criteria described  
124 by Schneider et al<sup>70</sup> and based on the fact that 95% of social interactions (approach, touch and social clustering) occur  
125 in the range of 1-8 mm (fig. S1 A-C), we set the distance threshold for interaction between two flies to be 8mm or  
126 less, which is average of two body lengths. (2) the visual field of view of the focal fly is occupied by the other fly  
127 (angle subtended>0), indicating that the focal fly can see the other fly (Figure 1B). To minimize the number of false  
128 positives (random interactions), we required the angle and distance criteria be maintained for at least 2 seconds (Fig.  
129 1C). This resulted in a large number of very short interactions, some of which could actually be long interactions that  
130 are mistakenly recognized as separate short interactions, due to small numbers of intermittent frames in which one  
131 of the conditions is not met (Fig. 1C). To resolve this, we added an additional requirement of a minimal time interval  
132 (gap) below which a subsequent interaction is considered an extension of the previous interaction between the same  
133 pair of flies. To find the optimal gap length, we tested a series of interaction and gap lengths and eventually selected  
134 a gap length of 4 s (120 frames) (Fig. S1D), which substantially reduced the number of very short interactions (Fig.  
135 1D). We used weighted networks to account for the between-dyad variation in total interaction times over each test,  
136 and to avoid network saturation, an inherent limitation of binary networks. Next, we analyzed the symmetry level  
137 between interacting flies, by testing whether the total amount of time in which individual (X) interacts with individual  
138 (Y) correlates with the total amount of time in which individual (Y) interacts with individual (X). Performing this  
139 for all pairs of flies within each group resulted in high correlation (Fig. 1E), which was also apparent when  
140 quantifying total number of interactions between each pair (Fig. 1F). This suggests symmetric interactions over the  
141 course of the test, making directed analysis redundant in this setup. We used the interaction data to calculate 4

142 network features; Strength, Density, Betweenness Centrality and Modularity (Schematic illustration and explanation  
143 of the features are depicted in Figure 2I). In total, our data analysis pipeline generates 60 features that represent the  
144 behavioral repertoire of individuals within a group and their corresponding social networks. To process and analyze  
145 such rich datasets, we generated a comprehensive representation of all features using normalized Z-score scatter plots  
146 and hierarchical clustering to compare between experimental groups and highlight similarities and differences  
147 between them (Fig. 1A).

#### 148 **Prior social interaction in a group facilitates the formation of ordered social structures**

149 To test whether social experience can drive divergent forms of group behaviors, we generated two cohorts  
150 of wild-type (WT) Canton S male flies; one cohort of flies raised for 3 days with nine other flies (as groups of 10  
151 male flies), while the other cohort raised in complete social isolation upon eclosion. After 3 days, 10 flies from each  
152 cohort were introduced into Fly Bowl arenas and their behavior was recorded for 15 minutes and analyzed (Fig. 1A).  
153 The two cohorts exhibited distinct repertoires of behavioral responses upon interaction with other flies in a group;  
154 socially raised flies displayed lower average activity levels, manifested by lower average velocity (Fig. 2A), shorter  
155 time spent walking (Fig. 2B) and fewer body turns than isolated male flies (Fig. 2C). Analysis of specific social  
156 behaviors revealed that socially raised flies exhibited less touch behavior (Fig. 2D), were less engaged in active  
157 approach (Fig. 2E) and spent less time chasing (Fig. 2F). Socially raised flies also spent more time grooming than  
158 isolated flies (Fig. 2H). Analysis of average duration (bout length) and frequency of specific behaviors revealed that  
159 touch, chase, approach, grooming and social clustering behaviors were significantly different between the two  
160 cohorts (Fig. 3A, Fig. S2A–H). Interestingly, average bout duration of approach behavior was similar between the  
161 two cohorts, while its frequency was higher in isolated flies (Fig. 3A and Fig. S2A, E), suggesting the difference in  
162 their social experience did not affect the duration of social encounters, but rather the frequency at which they occur.

163 The difference between socially raised and socially isolated flies can result from inherent differences in the  
164 kinetic properties of individuals, or from an emergent property of flies interacting in a group. To distinguish between  
165 these two possibilities, we compared the behavior of socially isolated and raised flies that were tested singly. If the  
166 differences between the groups stem from inherent differences in the kinetic properties of individuals, we would  
167 expect to identify kinetic differences between the two cohorts of singly tested flies. Remarkably, we did not observe  
168 any significant differences between the two cohorts, suggesting that the effects of social experience on behavior are  
169 an emergent group property expressed during group interaction (Fig. S3A-I). Another example for a difference in the  
170 emergent properties of socially raised and isolated groups is the tendency of socially raised flies to concentrate in  
171 certain zones within the arena, forming semi-stable social clusters consisting of three or more flies (Fig. 2G, Fig.  
172 S2M). This behavior was not apparent in male flies that raised in social isolation prior to testing, suggesting this  
173 behavior emerges from the social experience of flies rather than from the context of the behavioral test itself (Fig.  
174 2G).

175 To investigate how group structure is affected by social history, we analyzed the network structures of groups  
176 composed of socially raised or socially isolated individuals. We calculated network weights according to the overall

177 duration of interactions (emphasizing long-lasting interactions) or the overall number of interactions (emphasizing  
178 short interactions) between each pair of flies. Analysis by duration revealed that socially raised flies displayed higher  
179 modularity (Fig. 2K), SD strength (Fig. 2L) and betweenness centrality (Fig. S2L), suggesting that prior social  
180 experience promotes the formation of subgroups. Network analysis by number of interactions, which assigns equal  
181 values to long and short interactions and thus undervalues social clusters (Fig. 2J-L vs. M-O), revealed that the social  
182 networks of isolated flies are characterized by higher density (Fig. 2M), SD strength (Fig. 2O) and strength (Fig.  
183 3A), suggestive of overall more interactions. In contrast, networks of socially raised flies have higher modularity  
184 (Fig. 2N) and betweenness centrality (Fig. 3A), similar to the results obtained with analysis by duration of interaction.  
185 Taken together, these differences indicate that socially isolated flies perform more short interactions compared to  
186 socially raised flies, while socially raised flies form networks with higher-order structures compared to those formed  
187 by isolated flies. Overall, these results show that the behavioral group signature of socially raised flies differs from  
188 that of previously isolated ones (Fig. 3A).

189

### 190 **Behavioral signature of socially raised flies does not require individual recognition**

191 It is plausible that the observed differences between socially raised and isolated cohorts result from the  
192 familiarity of raised flies with the individuals they are tested with. Therefore, we asked whether the distinct features  
193 exhibited by socially raised males result from their familiarity with individual members that occurred during housing,  
194 or from the internal state associated with the general experience of living in a group. To distinguish between these  
195 two possibilities, we tested socially raised flies with either familiar or unfamiliar individuals. One cohort was tested  
196 with the same flies they were previously housed with (familiar), while the other cohort was tested with socially raised  
197 flies from other groups (unfamiliar). Encountering familiar or unfamiliar flies did not result in different behavioral  
198 signatures (Fig. 3B), suggesting that the dynamics captured during the test result from the general experience of  
199 interacting with others rather than by specific previous interactions. We next tested whether other conditions that are  
200 known to modulate internal state such as repeated ethanol exposure, starvation, and different circadian time shifts,  
201 also affect group interaction. We did not observe any significant difference between these conditions and their  
202 controls (Fig. S5), implying that not all experiences that modulate internal state affect group dynamics in the context  
203 used in our experimental paradigm.

204

### 205 **Prior social interaction increases behavioral variability**

206 The existence of a complex social structure in groups of socially raised flies suggests that in addition to the  
207 observed differences in the means of various behaviors, there may be additional effects on the distribution of certain  
208 features. Indeed, when analyzing the behavioral signatures of socially raised and isolated male flies, we observed  
209 that socially raised flies exhibited higher variance across several behavioral features (Fig. 2, 3A; compare error bars).  
210 To further investigate this, we compared the variance of all behavioral features between groups of socially raised and

211 isolated male flies. We analyzed the variance of each behavioral feature in three ways: (a) average standard deviation  
212 (SD) of each group (each movie), reflecting variation inside each group (SD within groups, Fig. 3C); (b) SD of  
213 averages between experimental groups per condition, reflecting variation between groups (SD between groups, Fig.  
214 3C); and (c) SD across all flies per condition, reflecting individual differences between all flies regardless of groups  
215 (SD all flies, Fig. 3C). We documented a higher number of behavioral features that displayed significantly higher  
216 variance (SD two-fold higher in one condition + statistically significant) in socially raised flies between groups (18  
217 out of 56 parameters; Fig. 3D), within groups (11 out of 56 parameters; Fig. 3D) as well as between all flies (21 out  
218 of 56 parameters; Fig. 3D). This indicates that the behavior of socially raised flies is more diverse than that of isolated  
219 flies, possibly reflecting a broader repertoire of behaviors in individuals which is shaped by prior interactions during  
220 the experience phase. Increased variability between groups of socially raised males that have presumably had  
221 identical experience suggests that each group possesses distinct group characteristics that were shaped during the  
222 housing period before the test. To test this hypothesis, we asked whether between-group variance stems from inter-  
223 individual recognition or is based on the general experience of living in a group. For that, we performed a similar  
224 analysis in male flies that were housed in groups and tested either with the same group members or with flies that  
225 were housed in other groups (data taken from the experiment of Fig. 3B). We documented very few parameters that  
226 were distributed differently between flies tested with familiar or unfamiliar flies, implying that the general experience  
227 of living in a group also shapes the variance of behavioral responses, and that individual recognition has little to no  
228 effect on behavioral variance in a group (Fig. 3E).

229

### 230 **Visual cues are necessary for expressing the behavioral signature of socially raised flies**

231 So far, we have shown that different types of social history can form divergent group dynamics and structure.  
232 Next, we set out to dissect the sensory elements required for the expression of such differences. We started by  
233 assessing the role of visual cues in forming specific behavioral signatures during the test. For that, we analyzed the  
234 behavior of socially raised flies in light or dark conditions (this did not interfere with tracking since recording is  
235 performed using IR backlight). Socially raised flies that were tested in the dark displayed more walk, turn and touch  
236 behaviors than those tested in the light (Fig. 4A), and spent a larger fraction of time in chase and approach behaviors,  
237 while showing less social clustering and grooming behaviors (Fig. 4A). Moreover, approach behavior in the dark  
238 was significantly longer and more frequent than that in the light (Fig. 4A), while frequency and duration of social  
239 clustering was lower in the dark. Interestingly, although the average velocity of flies in the presence or absence of  
240 light was not statistically different (Fig. 4A), flies tested in the light reduced their velocity over time, while flies  
241 tested in the dark maintained a constant velocity for the duration of the experiment. This was also evident in several  
242 other behavioral features, such as walk and turn behaviors, suggesting that flies habituate to environmental conditions  
243 in the light but not in the dark (Fig. S6A-F). Network analysis revealed lower SD strength and betweenness centrality  
244 in groups tested in the dark, by analysis of duration of interactions (Fig. 4A), while analysis by number of interactions



245 revealed that flies in the dark display higher density, strength and SD strength than flies in the light (Fig. 4A).  
246 Therefore, we postulate that light is required for the group signature of socially raised male flies.

247 We next aimed to uncouple the behavioral changes observed during light deprivation: those that result from  
248 the role of visual cues in a typical social interaction in a group, from those that specifically depend on prior social  
249 experience. For that, we tested groups of socially raised and socially isolated flies in the presence or absence of light  
250 (Fig. 4A, B). Behavioral features that are affected equally by light in both groups, represent features that are light-  
251 dependent but not sensitive to social experience, while features that are only affected in one group are those that turn  
252 into light-dependent by previous social experience. To visualize this, we plotted distinct features that are influenced  
253 by visual cues in each condition. We identified 22 unique features that are sensitive to visual cues only in socially  
254 raised flies, and only seven in isolated flies, suggesting that the experience of an enriched social environment requires  
255 light to be fully expressed (Fig. S4A). Most features unique to the socially raised group are associated with social  
256 clustering (reduced in the absence of light) and interaction (increased in the absence of light). The opposite regulation  
257 of these two types of features suggests that in the absence of light, socially raised flies undergo a shift from a quiescent  
258 state to a more active state, characterized by more approach, chase and touch behaviors. In contrast, groups of  
259 previously isolated flies displayed a decrease in a few interaction-related parameters and an increase in a class of  
260 parameters that reflect changes in angle and speed between two close individuals in the absence of light  
261 (absanglefrom1to2, absphidiff, absthetadiff and angleonclosestfly; see Table S1 for more details) (Fig. S4A). This  
262 may signify an increase in coordination between pairs of flies and suggest that isolated flies in the dark generally  
263 tend to be less mobile but more engaged with others when interacting (Fig. 4B, Fig. S4A).

264 To assess whether the group signatures of these conditions reveal an underlying similarity, we performed  
265 hierarchical clustering analysis on group signatures of all conditions (Fig. 4C, list of features in Fig. S4B). This  
266 analysis revealed two main clusters based on social history; one of conditions in which flies were isolated prior to  
267 the test and another of conditions in which flies were socially raised. Interestingly, socially raised flies that were  
268 tested in the dark did not cluster with either groups, reinforcing the notion that specific visual cues are necessary for  
269 the expression of group signatures associated with social experience, but are not sufficient to fully shift group  
270 signature from that of socially raised to that of isolated.

## 271 272 **cVA perception via Or65a neurons shapes social group interaction**

273 In addition to visual cues, a central element in social interaction of flies is pheromone-based communication. The  
274 male-specific pheromone cVA is known to mediate experience-dependent changes in aggressive behavior, where  
275 chronic exposure to cVA found on conspecifics during group housing, is known to reduce male–male aggression<sup>61,81</sup>.  
276 cVA is perceived via two olfactory receptor neurons (ORNs): Or67d, which mediates acute responses to cVA, and  
277 Or65a, which mediates chronic responses to cVA<sup>61,82</sup>. We investigated whether cVA perception impacts the group  
278 signature of socially raised flies. For that, we blocked cVA perception by constitutively expressing the inward

279 rectifying potassium channel Kir2.1 in Or65a- or Or67d-expressing neurons of socially raised flies and then analyzed  
280 their group behavior. Inhibition of Or67d neurons did not lead to major differences between experimental flies and  
281 genetic controls, suggesting that the function of Or67d neurons is not necessary for the formation of the behavioral  
282 signature associated with social group experience (Fig. 5A). In contrast, inhibition of Or65a neurons dramatically  
283 changed the group signature of socially raised flies, increasing average velocity and overall time flies engaged in  
284 approach, chase and touch behaviors compared to genetic controls (Fig. 5B). Network analysis revealed higher  
285 strength and lower betweenness centrality in the Or65a experimental group compared to genetic controls, by both  
286 duration and number of interactions (Fig. 5B). Overall, this suggests that Or65a- but not Or67d-expressing neurons  
287 function in shaping the group behavior of socially raised flies.

288 This experimental design does not distinguish between the role of Or65a neurons during experience and test  
289 phases, due to the constitutive nature of this neuronal inhibition. To test the role of Or65a neurons during the test  
290 phase, we performed a similar experiment in isolated male flies, which are expected to be exposed to cVA only  
291 during the test. If Or65a expressing neurons function only to shape the group signature of socially raised flies via  
292 exposure to cVA during the experience phase and before test, we expect the inhibition of these neurons not to affect  
293 the behavioral signature of isolated flies. Surprisingly, inhibition of Or65a neurons in isolated male flies resulted in  
294 changes of several behavioral features, although Or65a neurons are thought to only mediate chronic responses to  
295 cVA over long time courses<sup>61</sup>. Experimental flies (*Or65a>Kir*) exhibited more touch, approach, chase and chain  
296 behaviors than genetic controls, and increased network strength as measured by duration of interaction (Fig. 5C).  
297 However, these effects were less extreme than those displayed by socially raised male flies (Fig. 5B vs. 5C). This  
298 unexpected result suggests that Or65a neurons mediate acute as well as chronic responses to cVA.

299 Interestingly, some effects of Or65a neuronal inhibition are identical between socially isolated and socially  
300 raised flies, including a decrease in three coordination-related parameters (Fig. S7A–C) and a significant increase in  
301 chain, chase, chase bout length, touch and approach behaviors (Fig. S7D–H). Moreover, both experimental groups  
302 displayed higher network strength (measured by duration of interaction, Fig. S7I), suggesting that inhibition of Or65a  
303 neuronal activity facilitates behaviors that are associated with social isolation. Overall, although these two conditions  
304 share similarities, the effect of Or65a inhibition was more profound in socially raised flies than in socially isolated  
305 flies, reflected by the higher number of behavioral features affected (35 vs. 22 out of 60, Fig. 5B, C). Hierarchical  
306 clustering analysis between conditions revealed that flies in which Or67d neurons were inhibited are similar to their  
307 corresponding genetic controls, supporting the conclusion that Or67d neurons do not mediate behavioral responses  
308 of socially raised male flies in a group (Fig. 5D). In contrast, socially raised male flies in which Or65a neurons were  
309 inhibited are clustered apart from their genetic controls and all other tested conditions, indicating that cVA perception  
310 though Or65a sensing neurons is necessary for the formation of a certain internal motivational state via the experience  
311 of group housing, leading to a specific group signature (Fig. 5D).

312 **Heterogenous groups of flies exhibit dynamic social interaction that is shaped by group composition**

313 So far, we have used homogenous groups of flies which were subjected to environmental or genetic  
314 manipulation as a tool to investigate the interplay between social experience and the resulting group behavior. This  
315 approach eliminates the inherent contribution of inter-individual differences to group structure, which proved  
316 valuable in dissecting the elements that shape social group behavior. Next, we asked how the dynamics inside the  
317 group are shaped by different individuals. For this, we generated groups that contain varying ratios of male flies with  
318 two distinct states: socially raised flies and hyper-aggressive isolated flies. Hyper-aggressive male flies were  
319 generated by knocking down (k.d) *Cyp6a20* (a manipulation known to induce aggression)<sup>20</sup>, and keeping these flies  
320 isolated from eclosion. We postulated that highly aggressive k.d flies would disrupt collective-like group behaviors  
321 such as social clustering and thus change the behavioral signature of the group.

322 To verify that these flies indeed behave as expected, we tested their social interaction in groups of flies, and  
323 compared it to *Cyp6a20* k.d flies that were socially raised before the test and to that of socially raised WT control  
324 flies (Fig. S8). We did not document any difference between the two cohorts of *Cyp6a20* k.d flies. However,  
325 compared to the WT control group, both *Cyp6a20* k.d cohorts displayed more walk, turn and chase behaviors (Fig.  
326 S8 B,C,F), while exhibiting lower social clustering and grooming behaviors, as expected (Fig. S8 G,H). This suggests  
327 that the genetic manipulation in this case eliminates the effects of previous social experience on group signature.

328 Next, we introduced increasing numbers of hyper-aggressive flies into groups of socially raised WT male  
329 flies (10%–50% of the total number of individuals) and measured their group behavior. The behavior of each  
330 experimental group was normalized to a control group of 100% socially raised WT flies which was tested at the same  
331 time, enabling statistical comparison of all behavioral features across all experimental groups (0-50%), unlike  
332 previous experiments in this work which can only be compared to their controls. To gain a general overview of the  
333 patterns associated with gradual changes in group composition, we examined the normalized behavioral signatures  
334 using hierarchal clustering (Fig. 6A). Overall, the conditions are clustered into two main branches: one containing  
335 the homogenous WT group with the 10%–30% mixed ratio groups, and a separate branch containing groups of 40%–  
336 50% mixed ratios, suggesting a behavioral transition from homogenous to 50% mixed ratio groups. The differences  
337 between these two extremes resemble those of socially raised vs. socially isolated flies, suggesting that the addition  
338 of 50% aggressive flies is sufficient to convert group behavior into that of a social isolation-like state (Fig. 4C vs.  
339 Fig. 6A). Overall, clustering of features suggests a somewhat gradual transition from 0 to 50%. This trend is best  
340 demonstrated by the increase in the number of features that exhibit a significant difference compared to 100% WT  
341 flies (Fig. 6B). We identified a suit of features associated with an increasing number of *Cyp6a20*-knockdown (KD)  
342 flies: a cluster of decreasing features and a cluster of increasing features (Fig. 6A). Some decreasing features  
343 corresponded to social clustering and network structure, while increasing features were related to activity and  
344 interaction (Fig. 6A). Some of these features exhibited a gradual change as the number of *Cyp6a20*-KD flies in a  
345 group increased. These included a gradual decrease in social clustering, grooming, stop, and stop bout length (Fig.  
346 S9A–D), and a gradual increase in walk, angular speed (absdtheta), turn, and turn bout length (Fig. S9E–H).  
347 Interestingly, some behavioral features showed parabolic-like changes across increasing ratios of *Cyp6a20*-KD flies,

348 with maximal or minimal values at 20%–30%, including touch behavior and several other features expected to be  
349 associated with coordination between two individuals (`absphidiff_nose2ell`, `absphidiff_anglesub`; Table 1). Some  
350 behavioral features were more sensitive than others to changes in group composition, such as grooming, approach  
351 and turn behaviors, which were significantly different from controls even at 20% mixed ratio, while other features  
352 such as social clustering exhibit a significant change only at 40-50%. This suggests that changes in the level of  
353 approach behavior within a group precede changes in more collective-like behaviors such as social clustering (Fig.  
354 6A).

355           It could be argued that the behavioral pattern exhibited by mixed groups represents an average of two distinct  
356 subgroups and not an integrated structure of all individuals within the group. If so, the differences observed at the  
357 group level would result from the existence of *Cyp6a20*-KD flies having higher values of approach behavior and  
358 lower values of social clustering, which would drastically affect the group average, depending on their relative ratio  
359 within the group. To test this, we analyzed the per-fly distribution of each condition. If each group is composed of  
360 two distinct subgroups (WT and *Cyp6a20*-KD flies), we would expect this to be reflected in a bi-modal distribution,  
361 which would become more pronounced as the ratio of *Cyp6a20* k.d flies increases. Single-fly analysis of features  
362 that exhibit changes with an increased number of mutant flies, such as walk, approach and social clustering, did not  
363 show a bi-modal distribution, making it impossible to identify subgroups that correspond to mutant or WT flies (Fig.  
364 6C, f-test). To further analyze the distribution of group members in these mixed-ratio groups, we use t-SNE, a  
365 dimensionality reduction technique, to analyze all individuals across all features, which failed to depict any clear  
366 existence of subgroups (Fig. 6D). This finding suggests that both WT and mutant flies change their behavioral  
367 responses when interacting in a group to generate a single behavioral signature, implying that group structure and  
368 dynamics reflect a level of complexity that cannot be explained as a simple average of the individuals that constitute  
369 it.

## 370 Discussion

371 Understanding the principles underlying the complex nature of social group interaction is conceptually and  
372 computationally challenging. In this work, we simplified this complex phenomenon to a series of experiments in  
373 which we controlled the social experience and internal states of individuals within a group to illuminate patterns  
374 representing distinct structures and behavioral responses of groups under different social conditions. Each condition  
375 was represented by a “group signature” containing a collection of 60 distinct social network and behavioral features.  
376 This comprehensive analysis provided a broad examination of behavioral states, highlighting similarities and  
377 differences between groups, confirming our initial hypothesis that different social histories give rise to the formation  
378 of distinct and robust group signatures, that are indicative of specific social group structures. We showed that groups  
379 composed of socially raised male flies exhibit social clusters and high network modularity, indicating the existence  
380 of stable subgroups and ordered social structure that are not apparent in groups of isolated flies. Some of the observed  
381 differences between the groups of socially raised and socially isolated flies satisfied our initial predictions, such as  
382 the increased activity in isolated flies and increased social interaction, as well as the formation of social clusters in  
383 the socially raised group due to reduced aggression. On the other hand, the prediction that isolated flies will exhibit  
384 social avoidance was not supported. In fact, socially isolated flies displayed higher number of interactions,  
385 approaches, and network density.

386 Using hierarchical clustering to compare between group signatures allowed us to identify specific elements  
387 which are shared across conditions. For instance, clustering of socially raised flies tested in the dark with that of  
388 previously isolated flies highlights the contribution of visual cues to the expression of group signatures, whereas  
389 clustering analysis of flies in which cVA sensing neurons were inhibited suggests that cVA perception shapes group  
390 structure during experience phase and during test. Moreover, the analysis of group signatures revealed two aspects  
391 relevant to the connection between sensory information and behavior: (a) existence of behavioral features that are  
392 “primed” by social experience to become light-dependent (i.e. social experience affects their light-dependence); (b)  
393 an emerging role for *Or65a* expressing neurons in regulating acute male–male interactions in addition to its well-  
394 established role in suppressing aggression upon long exposure to cVA<sup>61</sup> or possibly a cVA independent role.  
395 Accordingly, hierarchical clustering indicated that inhibition of *Or65a* neurons affected many features in socially  
396 raised flies, some of which were also changed in isolated flies and are associated with increased activity in both  
397 cohorts. These common features are higher in isolated experimental flies when compared to their corresponding  
398 genetic controls, suggesting a role for *Or65a* neurons in reducing activity levels during the test.

399 Based on evidence suggesting that inter-individual recognition plays a role in male-male aggression  
400 encounters<sup>83</sup>, we expected recognition to shape also social interaction in of flies. We found no evidence for a role of  
401 inter-individual recognition in the formation of groups composed from socially raised flies, suggesting that although  
402 recognition is valuable in the context of aggression over limited resources, the context used in our study is not  
403 sufficient to measure its importance. This finding is consistent with studies in social insects demonstrating that  
404 collective group behaviors do not require individual recognition<sup>5</sup>. Another example for the role of context to the

405 expression of behavior is seen in the emergent differences in group behavior between groups of socially raised and  
406 isolated flies that are only evident in group context and not when the flies are tested alone. This fits well the  
407 conceptual model proposed by Anderson and Adolphs for the interplay between emotional behaviors and distinct  
408 internal states<sup>11</sup>, suggesting that group signatures integrate the expression of internal states, shaped by experience,  
409 with the specific context in which group behavior is measured.

410 The differences in variance between socially raised and isolated flies indicate that early-life experiences can  
411 modulate behavioral variability within and between groups. Inter-individual variability is a broad phenomenon  
412 documented in many species<sup>84–92</sup>, and was shown recently to be under neuromodulation in *C. elegans*, suggesting  
413 that behavioral variability is a biologically regulated process<sup>93</sup>. The functional importance of such variability can be  
414 seen in *Drosophila* studies demonstrating that increased behavioral variability can contribute to fitness<sup>94</sup>. Notably,  
415 our results also reveal increased variability between groups of socially raised flies, suggesting that social experience  
416 increases the repertoire of possible group phenotypes, the functional outcome of which remains to be studied.

417 Using network analysis as a tool to quantify social structures, we show that certain aspects of group structure  
418 are modulated by the social history of individuals that compose the group. Previous studies in *Drosophila* used social  
419 network analysis to dissect the principles that shape social interaction<sup>13,70</sup>. Interestingly, although the presence of  
420 visual cues affected several network features in our behavioral setup, Schneider et al. reported no effects of the  
421 absence of light on network structure<sup>70</sup>. This apparent discrepancy between our study and that of Schneider et al.  
422 could result from different approaches when measuring network structure (binary vs. weighted); while both studies  
423 documented shorter interactions in the absence of light, the effect on network structure is only evident when using  
424 weighted networks.

425 Studies of collective behaviors in various animals including honeybees, ants, birds and fish exemplify  
426 synchronization as a key component of collective behavior<sup>1,5,95</sup>. Although *Drosophila* do not display such a degree  
427 of collective/coordinated behaviors as these organisms, they do exhibit behavioral responses that involve collective  
428 features, such as different responses to threat when in a group, changes in memory retrieval that depend on social  
429 experience, cooperation in feeding behavior and even aggregation, suggesting the existence of a collective response  
430 that can increase survival or reproductive success<sup>4,55,72,96–102</sup>. Adding to this, our results demonstrate the presence of  
431 social clusters, characterized with increased coordination between individuals, stable distances between individuals,  
432 long-lasting interactions, which are correlated with increased grooming, all of which are suggestive of a semi-  
433 collective state, in agreement with previous studies<sup>103,104</sup>. We show that the degree of this highly social state strongly  
434 depends on prior social experience, and its expression requires cVA perception and visual cues. The existence of  
435 such an ancient form of coordinated behavior may serve to explore the neuronal and genetic mechanisms underlying  
436 collective behaviors, as suggested by de Bono<sup>105</sup>.

437 Lastly, we demonstrate that group behavior and its corresponding structure depends on its composition.  
438 Hierarchical clustering of groups composed of different ratios of super-aggressive flies identified a cluster of features  
439 that is highly sensitive to changes in group composition. This cluster contains features associated with coordination

440 between individuals and features associated with social clustering, implying that specific clusters of behavioral  
441 parameters within a behavioral signature may reflect changes in the ability of the group to form semi-collective  
442 structures<sup>1</sup>. Importantly, although the groups of mixed populations consist of two types of individuals that form  
443 distinct signatures when tested separately, their combination does not result in two distinct populations but rather a  
444 single close to normal distribution of all individuals within the group, as supported by<sup>106</sup>. This raises questions about  
445 the interactions and mechanism that facilitate the formation of unimodal distribution in groups composed of  
446 individuals with highly different internal properties.

447         The finding of state-dependent group signatures hints at the existence of distinct and consistent behavioral  
448 responses of groups to specific social conditions, which give rise to distinct group structures. These structures and  
449 their dependency on specific sensory information raise questions about the kinetics of their formation and the  
450 neuronal mechanisms that shape interactions that sustain such structures. These complex multi-sensory requirements  
451 also raise general questions about the ability of semi-natural social interactions such as technology based social  
452 communication platforms to fully mimic the complex repertoire of experiences associated with face-to-face  
453 interaction, as a prerequisite for the full expression of social group interactions.

454 Acknowledgments: We thank all members of the Shohat-Ophir and Ilani labs for fruitful discussions and technical  
455 support. We specially thank Kristin Branson and Alice Robie (HHMI Janelia research campus) for their valuable  
456 advice and guidance with the experimental and computational design and for Karla Kaun (Brwon University) for her  
457 productive suggestions. This work was supported by the Israel Science Foundation Grant 384/14, Israel Science  
458 Foundation Grant 174/19 and Israel Science Foundation Grant 384/14.

459

460 Author contributions: Conceptualization, A.B., S.B.-S., A.I. and G.S.-O.; Methodology, A.B., and S.B.-S. and E.C;  
461 Investigation, Software, S.B.-S.; Writing, A.B, A.I. and G.S.-O.; Statistical Analysis, J.B., Funding Acquisition,  
462 G.S.-O and A.I ; Supervision, G.S.-O and A.I.

463



464 **Methods**

465

466 **Tracking**

467 Flies were inserted in groups of 10 into Fly Bowl arenas<sup>107</sup>, and 15 minutes of video was acquired with Fly Bowl  
468 Data Capture (FBDC)<sup>79</sup> and analyzed using CTRAX<sup>80</sup> to obtain flies' orientation, position, and trajectories.

469

470 **FixTRAX**

471 We programmed this additional software in MATLAB in order to fix CTRAX tracking errors. FixTRAX uses a set  
472 of assumptions to fix CTRAX output based on 4 types of errors we observed in our CTRAX output data, which  
473 mostly happen when flies are relatively immobile for long time periods and require correction prior to further  
474 analysis. The errors are: (a) unifying two or more identities when flies are close, (b) mistakenly identifying a dark  
475 spot as a fly, (c) not recognizing a fly for several frames and (d) not maintaining the same identities over the entire  
476 movie. FixTRAX uses two fix algorithms; a main algorithm and a subsidiary control algorithm (Supp FixTRAX code  
477 and user instructions). The main algorithm is based on finding a sequence of incorrect frames that represent one  
478 mistake, then creating a table from that sequence with statistical scores for every pair of identities: one that  
479 disappeared and another that appeared. This score represents the probability that the two identities represent the same  
480 fly. Based on their score, the algorithm decides which identities to unify and which identities are false and can be  
481 deleted. After unifying two identities, data for missing frames is computed according to the fly's approximate  
482 location, calculated as the shortest path between start and end positions of that specific error. The subsidiary algorithm  
483 unifies each identity that disappeared with the first identity that appeared. Both algorithms stop when all identities  
484 are unified, and the number of identities matches the number of flies the user stated are in the video. FixTRAX selects  
485 the fix algorithm that was able to maintain the identities of all flies in the movie with minimal insertions or deletions  
486 of identities to the original tracking file. Finally, FixTRAX plots a graph of the number of identities that were added  
487 and deleted for per frame, which can help the user adjust CTRAX's tracking parameters and the fix algorithm  
488 parameters to minimize tracking errors. Experiments which were not tracked correctly were discarded. Finally,  
489 FixTRAX output is converted into JAABA compatible output using the algorithm specified in Kabra et al.<sup>78</sup> to  
490 generate general statistical features as in<sup>80</sup> (Fig. 3A). FixTRAX error rate is presented in FixTRAX error rate  
491 supplementary file.

492

493 **Kinetic analysis**

494 Scripts were written in MATLAB to use the JAABA code to generate the statistical features as specified in Kabra et  
495 al.<sup>78</sup>. Time series graphs (per frame) were created using JAABA Plot<sup>78</sup>.

496

497 **Quantification of specific behaviors**

498 JAABA Classifiers<sup>78</sup> were trained on various movies to identify specific behaviors: Walk, Stop, Turn, Approach,  
499 Touch, Chase, Chain, Song, Social Clustering and Grooming. Bar graphs were created using JAABA Plot<sup>78</sup>.

500

## 501 **Network analysis**

502 An Interaction matrix was created in MATLAB (using the interaction parameters stated below) and saved as a text  
503 file. Two interaction matrices were created for each movie, one with the total number of frames each pair of flies  
504 were interacting divided by the number of frames in the movie and another with the number of separate interactions  
505 between each pair of flies divided by the maximum number of possible interactions, calculated as:

506

$$507 \quad \text{max \# of interaction possible} = \frac{\text{\# of frames} - \text{min \# of frames for interaction}}{\text{min \# of frames for interaction} + \text{min \# of gap frames}} + 1$$

508

509 The parameters to define an interaction are: angle subtended by the other fly > 0, distance between the nose of current  
510 fly to any point on the other fly ≤ 8 mm, number of frames for interaction ≥ 60 and number of gap frames ≥ 120.  
511 Interaction end is defined when distance or angle conditions are not maintained for 4 seconds.

512 Networks and their features were generated from the interaction matrix in R using the igraph package<sup>108</sup>. The function  
513 that was used to generate networks is “graph\_from\_adjacency\_matrix” with parameters “mode = undirected” and  
514 “weighted = TRUE”. Density was calculated on all movies with the formula:

515

$$516 \quad \text{density} = \frac{\text{sum of weights}}{[\text{number of vertices} * (\text{number of vertices} - 1)] * 0.5}$$

517

518 Modularity was calculated using the “modularity” function on output from the “cluster\_walktrap” function<sup>109</sup>.  
519 Strength was calculated using “strength” function and SD Strength was calculated on all movies using “sd” function  
520 on the strength value. Betweenness Centrality was calculated on all flies using the “betweenness” function and SD  
521 Betweenness Centrality was calculated on all movies using “sd” function on the Betweenness Centrality value. Box  
522 plots were created using R.

523

## 524 **Variance analysis**

525 Standard deviation (SD) of all flies was calculated as standard deviation of all per-fly data (all experimental  
526 repetitions together) for each feature per condition. SD between groups was calculated as standard deviation of all  
527 per-movie (experimental repetitions) averages for each feature per condition. SD within groups was calculated as the  
528 average of all per-movie standard deviations (variance within each experimental repetition) for each feature in each  
529 condition.

530

## 531 **Standardization and normalization**

532 For all experiments except those of ratios of sub populations (Fig. 6), each feature was standardized according to all  
533 values calculated in our experiments for that feature to generate a z-score, as was done by Schneider et al.<sup>70</sup>. Scatter  
534 plots were created using R.

535 Sub populations experiment (Fig. 6): Each feature in every experimental group was first normalized to a control  
536 condition of 10 WT flies. Features were then standardized according to all normalized values of all other experimental  
537 groups to generate z-scores.

538

### 539 **Hierarchical clustering**

540 Hierarchical clustering and heatmaps were created using Partek® software (Copyright, Partek Inc. Partek and all  
541 other Partek Inc. product or service names are registered trademarks or trademarks of Partek Inc., St. Louis, MO,  
542 USA). Each condition (heatmaps y axis) represents average standardized values of all repetitions.

543

### 544 **Fly lines**

545 Flies were raised at 25°C in a 12-h light/12-h dark cycle in 60% relative humidity and maintained on cornmeal, yeast,  
546 molasses, and agar medium. Canton S flies were used as the wild-type strain. All transgenic fly lines were  
547 backcrossed at least 5 generations into a white Canton S background. Or67d-GAL4, Or65a-GAL4 and UAS-Kir2.1  
548 fly lines were obtained from HHMI Janelia Research Campus. Cyp6a20-GAL4 was obtained from the Heberlein  
549 GAL-4 collection and Cyp6a20-RNAi was obtained from VDRC.

550

### 551 **Behavioral setup**

552 Socially raised vs. Isolated: flies were lightly anesthetized with CO<sub>2</sub> and collected shortly after hatching. Flies were  
553 then inserted into food vials, either alone (isolated) or as a group of 10 (raised) for 3 days, in a light/dark cycle of  
554 12/12. The isolated flies were inserted into a food vial in a group of 10 and then loaded into the test arenas, same as  
555 experienced flies. All flies experienced similar habituation to the arena of about 1 minute.

556

557 Light vs dark: flies were collected as before and housed in groups of 10 or in isolation as before. During the behavioral  
558 test, light was off (dark) or on (light).

559

560 Ethanol exposure: flies were housed in groups of 10 for 3 days as described above. Flies were then exposed to either  
561 ethanol (test) or water (control), for 4 consecutive days as described previously by<sup>110</sup>. Flies were then inserted into  
562 Fly Bowl arenas for video recording, as described above.

563

564 Circadian time shift: flies were housed in groups of 10 for 3 days as described above, or with a two hour time shift  
565 (late wake). Flies were then inserted into FlyBowl arenas as housed or as a mixed group of 5 flies from each condition  
566 (mixed).

567

568 Starvation: flies were collected in groups of 10 as described above. 24 hrs before the behavioral test, flies were either  
569 moved into vials containing agar (starved) or kept in vials with food (controls). Flies were then inserted into Fly  
570 Bowl arenas for video recording, as described above.

571

572 Ratios of sub populations within a group: WT flies were housed in groups of 10 as described above. Cyp6a20-Gal-  
573 4/+; UAS-Cyp6a20-RNAi/+ flies were collected and housed in isolation, as described above for WT isolated flies.  
574 Flies were then inserted into FlyBowl arenas in groups of 10, composed of varying amounts of knock-down flies (1  
575 to 5) and WT flies (9 to 5) for video recording. Video recording was performed as described above.

576

### 577 **Statistical analysis**

578 For each experiment except experiments with Cyp6a20 RNAi flies, Shapiro–Wilk test was done on each experiment  
579 to test for normal distribution.

580

581 For experiments with two-conditions: statistical significance was determined by t-test for experiments that were  
582 distributed normally, and by Wilcoxon test for experiments that were not distributed normally.

583 For experiments with three or four conditions: statistical significance determined by one-way ANOVA followed by  
584 Tukey's range test for experiments that were distributed normally, and by Kruskal–Wallis test followed by Wilcoxon  
585 signed-rank test for experiments that were not distributed normally.

586

587 Variance: F-test of the equality of two variances was used for all-flies analysis and between-group analysis. Students  
588 t-test was used for averages of within groups analysis. FDR correction for multiple testing was performed for all  
589 analyses.

590

591 Ratios of sub populations normalized to controls: To compare log-ratios of means (test/control), all values were log2-  
592 transformed and differences between mean log-values were tested. Specifically, the effect of treatment and mutant  
593 number on the fraction of each parameter was tested with a linear regression and a 2-way ANOVA was performed  
594 on the resulting model. Log-ratios between different number of mutants were compared in terms of difference of  
595 differences defined by linear contrasts and FDR correction was applied to all comparisons.

596

597 t-SNE analysis: Visualized using t-Stochastic Neighbor Embedding (t-SNE), using the Barnes-Hut algorithm and  
598 implementation (<http://homepage.tudelft.nl/19j49/t-SNE.html>).

599

## 600 References

- 601  
602 1. Couzin, I. D. Synchronization : The Key to Effective Communication in Animal Collectives. *Trends Cogn.*  
603 *Sci.* **22**, 844–846 (2018).
- 604 2. Dyer, J. R. G., Johansson, A., Helbing, D., Couzin, I. D. & Krause, J. Leadership, consensus decision  
605 making and collective behaviour in humans. *Philos. Trans. R. Soc. Lond. B. Biol. Sci.* **364**, 781–789 (2009).
- 606 3. Falcón-Cortés, A., Boyer, D. & Ramos-Fernández, G. Collective learning from individual experiences and  
607 information transfer during group foraging. *J. R. Soc. Interface* **16**, (2019).
- 608 4. Ramdya, P. *et al.* Mechanosensory interactions drive collective behaviour in *Drosophila*. *Nature* **519**, 233–  
609 236 (2015).
- 610 5. Feinerman, O. & Korman, A. Individual versus collective cognition in social insects. *J. Exp. Biol.* **220**, 73–  
611 82 (2017).
- 612 6. Forkosh, O. *et al.* Identity domains capture individual differences from across the behavioral repertoire. *Nat.*  
613 *Neurosci.* **22**, 2023–2028 (2019).
- 614 7. Aureli, F. & Schino, G. Social complexity from within: how individuals experience the structure and  
615 organization of their groups. *Behavioral Ecology and Sociobiology* vol. 73 1–13 (2019).
- 616 8. Shemesh, Y. *et al.* High-order social interactions in groups of mice. *Elife* **2013**, (2013).
- 617 9. Hobson, E. A., Ferdinand, V., Kolchinsky, A. & Garland, J. Rethinking animal social complexity measures  
618 with the help of complex systems concepts. *Animal Behaviour* vol. 155 287–296 (2019).
- 619 10. Datta, S. R., Anderson, D. J., Branson, K., Perona, P. & Leifer, A. Computational Neuroethology: A Call to  
620 Action. *Neuron* vol. 104 11–24 (2019).
- 621 11. Anderson, D. J. & Adolphs, R. A Framework for Studying Emotions across Species. *Cell* **157**, 187–200  
622 (2014).
- 623 12. Geiger, A. P. & Saltz, J. B. Strong and weak cross-sex correlations govern the quantitative-genetic  
624 architecture of social group choice in *Drosophila melanogaster*. *Evolution (N. Y.)* **74**, 145–155 (2020).
- 625 13. Liu, G. *et al.* A simple computer vision pipeline reveals the effects of isolation on social interaction  
626 dynamics in *Drosophila*. **14**, e1006410 (2018).
- 627 14. Shohat-Ophir, G., Kaun, K. R., Azanchi, R., Mohammed, H. & Heberlein, U. Sexual experience affects  
628 ethanol intake in *Drosophila* through Neuropeptide F. *Science (80-. )*. **335**, 1351–1355 (2012).
- 629 15. Bentzur, A. *et al.* Odorant binding protein 69a connects social interaction to modulation of social  
630 responsiveness in *Drosophila*. *PLoS Genet.* **14**, (2018).
- 631 16. Wang, X. *et al.* The locust genome provides insight into swarm formation and long-distance flight. *Nat.*  
632 *Commun.* **5**, 2957 (2014).
- 633 17. Zernig, G. & Pinheiro, B. S. Dyadic social interaction inhibits cocaine-conditioned place preference and the  
634 associated activation of the accumbens corridor. *Behav. Pharmacol.* **26**, 580–94 (2015).
- 635 18. Agrawal, P., Chung, P., Heberlein, U. & Kent, C. Enabling cell-type-specific behavioral epigenetics in  
636 *Drosophila*: A modified high-yield INTACT method reveals the impact of social environment on the  
637 epigenetic landscape in dopaminergic neurons. *BMC Biol.* **17**, (2019).
- 638 19. Zer-Krispil, S. *et al.* Ejaculation Induced by the Activation of Crz Neurons Is Rewarding to *Drosophila*  
639 Males. *Curr. Biol.* (2018) doi:10.1016/j.cub.2018.03.039.
- 640 20. Wang, L., Dankert, H., Perona, P. & Anderson, D. J. A common genetic target for environmental and  
641 heritable influences on aggressiveness in *Drosophila*. *Proc. Natl. Acad. Sci. U. S. A.* **105**, 5657–63 (2008).
- 642 21. Zelikowsky, M. *et al.* The Neuropeptide Tac2 Controls a Distributed Brain State Induced by Chronic Social  
643 Isolation Stress. *Cell* **173**, 1265–1279.e19 (2018).
- 644 22. Pinna, G. Animal models of PTSD: The socially isolated mouse and the biomarker role of allopregnanolone.  
645 *Frontiers in Behavioral Neuroscience* vol. 13 (2019).
- 646 23. De Bono, M. & Bargmann, C. I. Natural variation in a neuropeptide Y receptor homolog modifies social  
647 behavior and food response in *C. elegans*. *Cell* **94**, 679–689 (1998).
- 648 24. Coleing, A. The application of social network theory to animal behaviour. *Biosci. Horizons* **2**, 32–43  
649 (2009).
- 650 25. Robie, A. A., Seagraves, K. M., Egnor, S. E. R. & Branson, K. Machine vision methods for analyzing social  
651 interactions. *Journal of Experimental Biology* vol. 220 25–34 (2017).
- 652 26. Kwok, R. Deep learning powers a motion-tracking revolution. *Nature* vol. 574 137–138 (2019).

- 653 27. Brewster, L. R. *et al.* Development and application of a machine learning algorithm for classification of  
654 elasmobranch behaviour from accelerometry data. *Mar. Biol.* **165**, (2018).
- 655 28. Valletta, J. J., Torney, C., Kings, M., Thornton, A. & Madden, J. Applications of machine learning in  
656 animal behaviour studies. *Animal Behaviour* vol. 124 203–220 (2017).
- 657 29. Wang, G. Machine learning for inferring animal behavior from location and movement data. *Ecol. Inform.*  
658 **49**, 69–76 (2019).
- 659 30. Weinstein, B. G. A computer vision for animal ecology. *J. Anim. Ecol.* **87**, 533–545 (2018).
- 660 31. Anderson, D. J. & Perona, P. Perspective Toward a Science of Computational Ethology. *Neuron* **84**, 18–31  
661 (2014).
- 662 32. Farine, D. R. & Whitehead, H. Constructing, conducting and interpreting animal social network analysis. *J.*  
663 *Anim. Ecol.* **84**, 1144–1163 (2015).
- 664 33. Finn, K. R., Silk, M. J., Porter, M. A. & Pinter-Wollman, N. The use of multilayer network analysis in  
665 animal behaviour. *Animal Behaviour* vol. 149 7–22 (2019).
- 666 34. Pasquaretta, C. *et al.* How social network structure affects decision-making in *Drosophila melanogaster*. *R.*  
667 *Soc.* **283**, 20152954 (2016).
- 668 35. Lopes, P. C., Block, P. & König, B. Infection-induced behavioural changes reduce connectivity and the  
669 potential for disease spread in wild mice contact networks. *Sci. Rep.* **6**, (2016).
- 670 36. Kulahci, I. G., Rubenstein, D. I. & Ghazanfar, A. A. Lemurs groom-at-a-distance through vocal networks.  
671 *Anim. Behav.* **110**, 179–186 (2015).
- 672 37. Brent, L. J. N. Friends of friends: Are indirect connections in social networks important to animal  
673 behaviour? *Anim. Behav.* **103**, 211–222 (2015).
- 674 38. Wey, T., Blumstein, D. T., Shen, W. & Jordán, F. Social network analysis of animal behaviour: a promising  
675 tool for the study of sociality. *Animal Behaviour* vol. 75 333–344 (2008).
- 676 39. Sarkar, A. *et al.* Microbial transmission in animal social networks and the social microbiome. *Nature*  
677 *Ecology and Evolution* vol. 4 1020–1035 (2020).
- 678 40. Carter, G. G., Schino, G. & Farine, D. Challenges in assessing the roles of nepotism and reciprocity in  
679 cooperation networks. *Anim. Behav.* **150**, 255–271 (2019).
- 680 41. Balasubramaniam, K. N. *et al.* Affiliation and disease risk: social networks mediate gut microbial  
681 transmission among rhesus macaques. *Anim. Behav.* **151**, 131–143 (2019).
- 682 42. Webber, Q. M. R. & Vander Wal, E. Trends and perspectives on the use of animal social network analysis  
683 in behavioural ecology: a bibliometric approach. *Anim. Behav.* **149**, 77–87 (2019).
- 684 43. Sih, A., Spiegel, O., Godfrey, S., Leu, S. & Bull, C. M. Integrating social networks, animal personalities,  
685 movement ecology and parasites: a framework with examples from a lizard. *Anim. Behav.* **136**, 195–205  
686 (2018).
- 687 44. Gilbertson, M. L. J., Fountain-Jones, N. M. & Craft, M. E. Incorporating genomic methods into contact  
688 networks to reveal new insights into animal behaviour and infectious disease dynamics. *Behaviour* **155**,  
689 759–791 (2018).
- 690 45. Kulahci, I. G., Ghazanfar, A. A. & Rubenstein, D. I. Consistent individual variation across interaction  
691 networks indicates social personalities in lemurs. *Anim. Behav.* **136**, 217–226 (2018).
- 692 46. Sah, P., Mann, J. & Bansal, S. Disease implications of animal social network structure: A synthesis across  
693 social systems. *Journal of Animal Ecology* vol. 87 546–558 (2018).
- 694 47. Larson, S. M., Ruiz-Lambides, A., Platt, M. L. & Brent, L. J. N. Social network dynamics precede a mass  
695 eviction in group-living rhesus macaques. *Anim. Behav.* **136**, 185–193 (2018).
- 696 48. LeBoeuf, A. C., Benton, R. & Keller, L. The molecular basis of social behavior: models, methods and  
697 advances. *Curr. Opin. Neurobiol.* **23**, 3–10 (2012).
- 698 49. Asahina, K. Sex differences in *Drosophila* behavior: qualitative and quantitative dimorphism. *Current*  
699 *Opinion in Physiology* vol. 6 35–45 (2018).
- 700 50. Hoopfer, E. D. Neural control of aggression in *Drosophila*. *Current Opinion in Neurobiology* vol. 38 109–  
701 118 (2016).
- 702 51. Aranha, M. M. & Vasconcelos, M. L. Deciphering *Drosophila* female innate behaviors. *Current Opinion in*  
703 *Neurobiology* vol. 52 139–148 (2018).
- 704 52. Auer, T. O. & Benton, R. *Sexual circuitry in Drosophila*. *Current Opinion in Neurobiology* vol. 38 18–26  
705 (2016).
- 706 53. Dulac, C. & Dickson, B. J. Editorial overview: Neurobiology of sex. *Current Opinion in Neurobiology* vol.

- 707 38 A1–A3 (2016).
- 708 54. Hoopfer, E. D., Jung, Y., Inagaki, H. K., Rubin, G. M. & Anderson, D. J. P1 interneurons promote a  
709 persistent internal state that enhances inter-male aggression in *Drosophila*. *Elife* **4**, e11346 (2015).
- 710 55. Lihoreau, M., Clarke, I. M., Buhl, J., Sumpter, D. J. T. & Simpson, S. J. Collective selection of food patches  
711 in *Drosophila*. *J. Exp. Biol.* **219**, 668–675 (2016).
- 712 56. von Philipsborn, A. C. *et al.* Neuronal control of *Drosophila* courtship song. *Neuron* **69**, 509–22 (2011).
- 713 57. Koganezawa, M., Kimura, K. ichi & Yamamoto, D. The Neural Circuitry that Functions as a Switch for  
714 Courtship versus Aggression in *Drosophila* Males. *Curr. Biol.* **26**, 1395–1403 (2016).
- 715 58. Cohn, R., Morante, I. & Ruta, V. Coordinated and Compartmentalized Neuromodulation Shapes Sensory  
716 Processing in *Drosophila*. *Cell* **163**, 1742–1755 (2015).
- 717 59. Ribeiro, I. M. A. *et al.* Visual Projection Neurons Mediating Directed Courtship in *Drosophila*. *Cell* **174**,  
718 607–621.e18 (2018).
- 719 60. Shohat-Ophir, G., Kaun, K. R., Azanchi, R., Mohammed, H. & Heberlein, U. Sexual deprivation increases  
720 ethanol intake in *Drosophila*. *Science* **335**, 1351–5 (2012).
- 721 61. Liu, W. *et al.* Social regulation of aggression by pheromonal activation of Or65a olfactory neurons in  
722 *Drosophila*. *Nat. Neurosci.* **14**, 896–902 (2011).
- 723 62. Andrews, J. C. *et al.* Octopamine Neuromodulation Regulates Gr32a-Linked Aggression and Courtship  
724 Pathways in *Drosophila* Males. *PLoS Genet.* **10**, (2014).
- 725 63. Keleman, K. *et al.* Dopamine neurons modulate pheromone responses in *Drosophila* courtship learning.  
726 *Nature* **489**, 145–9 (2012).
- 727 64. Zacarias, R., Namiki, S., Card, G. M., Vasconcelos, M. L. & Moita, M. A. Speed dependent descending  
728 control of freezing behavior in *Drosophila melanogaster*. *Nat. Commun.* **9**, (2018).
- 729 65. Soto-Yéber, L., Soto-Ortiz, J., Godoy, P. & Godoy-Herrera, R. The behavior of adult *Drosophila* in the  
730 wild. *PLoS One* **13**, e0209917 (2018).
- 731 66. Stamps, J. A. & Blozis, S. A. Effects of natal experience on habitat selection when individuals make choices  
732 in groups: A multilevel analysis. *Anim. Behav.* **71**, 663–672 (2006).
- 733 67. Mohr, S. E. & Perrimon, N. *Drosophila melanogaster*: a simple system for understanding complexity.  
734 *Disease models & mechanisms* vol. 12 (2019).
- 735 68. Schneider, J., Atallah, J. & Levine, J. D. Social structure and indirect genetic effects: genetics of social  
736 behaviour. *Biol. Rev.* n/a-n/a (2016) doi:10.1111/brv.12267.
- 737 69. Schneider, J. *et al.* Can *Drosophila melanogaster* tell who 's who ? *PLoS One* **13**, e0205043 (2018).
- 738 70. Schneider, J., Dickinson, M. H. & Levine, J. D. Social structures depend on innate determinants and  
739 chemosensory processing in *Drosophila*. 1–6 (2012) doi:10.1073/pnas.1121252109/  
740 /DCSupplemental.www.pnas.org/cgi/doi/10.1073/pnas.1121252109.
- 741 71. Rooke, R., Rasool, A., Schneider, J. & Levine, J. D. *Drosophila melanogaster* behaviour changes in  
742 different social environments based on group size and density. *Commun. Biol.* **3**, 1–6 (2020).
- 743 72. Gibson, W. T. *et al.* Behavioral responses to a repetitive visual threat stimulus express a persistent state of  
744 defensive arousal in *Drosophila*. *Curr. Biol.* **25**, 1401–1415 (2015).
- 745 73. Arcego, D. M. *et al.* Impact of High-Fat Diet and Early Stress on Depressive-Like Behavior and  
746 Hippocampal Plasticity in Adult Male Rats. *Mol. Neurobiol.* **55**, 2740–2753 (2018).
- 747 74. Barrett, C. E., Arambula, S. E. & Young, L. J. The oxytocin system promotes resilience to the effects of  
748 neonatal isolation on adult social attachment in female prairie voles. *Transl. Psychiatry* **5**, (2015).
- 749 75. Leser, N. & Wagner, S. The effects of acute social isolation on long-term social recognition memory.  
750 *Neurobiology of Learning and Memory* vol. 124 97–103 (2015).
- 751 76. Haller, J., Harold, G., Sandi, C. & Neumann, I. D. Effects of Adverse Early-Life Events on Aggression and  
752 Anti-Social Behaviours in Animals and Humans. *J. Neuroendocrinol.* **26**, 724–738 (2014).
- 753 77. Holekamp, K. E. & Strauss, E. D. Aggression and dominance: an interdisciplinary overview. *Curr. Opin.*  
754 *Behav. Sci.* **12**, 44–51 (2016).
- 755 78. Kabra, M., Robie, A. A., Rivera-Alba, M., Branson, S. & Branson, K. JAABA: interactive machine learning  
756 for automatic annotation of animal behavior. *Nat. Methods* **10**, 64–67 (2013).
- 757 79. Robie, A. A. *et al.* Mapping the Neural Substrates of Behavior. *Cell* **170**, 393–406.e28 (2017).
- 758 80. Branson, K., Robie, A. A., Bender, J., Perona, P. & Dickinson, M. H. High-throughput ethomics in large  
759 groups of *Drosophila*. *Nat. Methods* **6**, 451–457 (2009).
- 760 81. Ejima, A. *et al.* Generalization of courtship learning in *Drosophila* is mediated by cis-vaccenyl acetate.

- 761 *Curr. Biol.* **17**, 599–605 (2007).
- 762 82. Kurtovic, A., Widmer, A. & Dickson, B. J. A single class of olfactory neurons mediates behavioural  
763 responses to a *Drosophila* sex pheromone. *Nature* **446**, 542–546 (2007).
- 764 83. Trannoy, S. & Kravitz, E. A. Learning and memory during aggression in *Drosophila*: handling affects  
765 aggression and the formation of a “loser” effect. *J. Nat. Sci.* **1**, e56- (2015).
- 766 84. Honegger, K. & de Bivort, B. Stochasticity, individuality and behavior. *Current Biology* vol. 28 R8–R12  
767 (2018).
- 768 85. Beever, E. A. *et al.* Behavioral flexibility as a mechanism for coping with climate change. *Frontiers in*  
769 *Ecology and the Environment* vol. 15 299–308 (2017).
- 770 86. Stamps, J. A. & Biro, P. A. Personality and individual differences in plasticity. *Curr. Opin. Behav. Sci.* **12**,  
771 18–23 (2016).
- 772 87. Vogt, G. *et al.* Production of different phenotypes from the same genotype in the same environment by  
773 developmental variation. *J. Exp. Biol.* **211**, 510–523 (2008).
- 774 88. Hadfield, M., Review, M. S.-O. L. & 1997, undefined. Variability, flexibility and plasticity in life histories  
775 of marine invertebrates. *infona.pl*.
- 776 89. Jeanson, R. & Weidenmüller, A. Interindividual variability in social insects - proximate causes and ultimate  
777 consequences. *Biol. Rev.* **89**, 671–687 (2014).
- 778 90. Körholz, J. C. *et al.* Selective increases in inter-individual variability in response to environmental  
779 enrichment in female mice. *Elife* **7**, (2018).
- 780 91. Gärtner, K. A third component causing random variability beside environment and genotype. A reason for  
781 the limited success of a 30 year long effort to standardize laboratory animals? *Lab. Anim.* **24**, 71–77 (1990).
- 782 92. Tervo, D. G. R. *et al.* Behavioral Variability through Stochastic Choice and Its Gating by Anterior  
783 Cingulate Cortex. *Cell* **159**, 21–32 (2014).
- 784 93. Stern, S., Kirst, C. & Bargmann, C. I. Neuromodulatory Control of Long-Term Behavioral Patterns and  
785 Individuality across Development. *Cell* **171**, 1649-1662.e10 (2017).
- 786 94. Kain, J. S. *et al.* Variability in thermal and phototactic preferences in *Drosophila* may reflect an adaptive  
787 bet-hedging strategy. *Evolution (N. Y.)*. **69**, 3171–3185 (2015).
- 788 95. Copenhagen, K., Quint, D. A. & Gopinathan, A. Self-organized sorting limits behavioral variability in  
789 swarms. *Sci. Rep.* **6**, (2016).
- 790 96. Ferreira, C. H. & Moita, M. A. Behavioral and neuronal underpinnings of safety in numbers in fruit flies.  
791 *bioRxiv* (2019).
- 792 97. Sehdev, A., Mohammed, Y. G., Tafrahi, C. & Szyszka, P. Social foraging extends associative odor-food  
793 memory expression in an automated learning assay for *Drosophila melanogaster*. *J. Exp. Biol.* **222**, (2019).
- 794 98. Ilany, A., Barocas, A., Koren, L., Kam, M. & Geffen, E. Structural balance in the social networks of a wild  
795 mammal. *Anim. Behav.* **85**, 1397–1405 (2013).
- 796 99. Ilany, A., Booms, A. S. & Holekamp, K. E. Topological effects of network structure on long-term social  
797 network dynamics in a wild mammal. *Ecol. Lett.* **18**, 687–695 (2015).
- 798 100. Barocas, A., Ilany, A., Koren, L., Kam, M. & Geffen, E. Variance in Centrality within Rock Hyrax Social  
799 Networks Predicts Adult Longevity. *PLoS One* **6**, e22375 (2011).
- 800 101. Chabaud, M. A., Isabel, G., Kaiser, L. & Preat, T. Social Facilitation of Long-Lasting Memory Retrieval in  
801 *Drosophila*. *Curr. Biol.* **19**, 1654–1659 (2009).
- 802 102. Dombrovski, M. *et al.* Cooperative Behavior Emerges among *Drosophila* Larvae. *Curr. Biol.* **27**, 2821-  
803 2826.e2 (2017).
- 804 103. Burg, E. D., Langan, S. T. & Nash, H. A. *Drosophila* social clustering is disrupted by anesthetics and in  
805 narrow abdomen ion channel mutants. *Genes, Brain Behav.* **12**, 338–347 (2013).
- 806 104. Jiang, L. *et al.* Emergence of social cluster by collective pairwise encounters in *Drosophila*. *Elife* **9**, (2020).
- 807 105. de Bono, M. Molecular approaches to aggregation behavior and social attachment. *J. Neurobiol.* **54**, 78–92  
808 (2003).
- 809 106. Philippe, A.-S. *et al.* Genetic variation in aggregation behaviour and interacting phenotypes in *Drosophila*.  
810 *Proc. R. Soc. B Biol. Sci.* **283**, 20152967 (2016).
- 811 107. Simon, J. C. & Dickinson, M. H. A new chamber for studying the behavior of *Drosophila*. *PLoS One* **5**,  
812 e8793 (2010).
- 813 108. Csardi, G. & Nepusz, T. The Igraph Software Package for Complex Network Research. *InterJournal*  
814 **Complex Sy**, 1695 (2005).



- 815 109. Pons, P. & Latapy, M. Computing communities in large networks using random walks. in *Lecture Notes in*  
816 *Computer Science (including subseries Lecture Notes in Artificial Intelligence and Lecture Notes in*  
817 *Bioinformatics)* vol. 3733 LNCS 284–293 (Springer, Berlin, Heidelberg, 2005).
- 818 110. Zer, S. *et al.* A Simple Way to Measure Alterations in Reward-seeking Behavior Using *Drosophila*  
819 *melanogaster*. *J. Vis. Exp.* e54910 (2016) doi:10.3791/54910.

A.

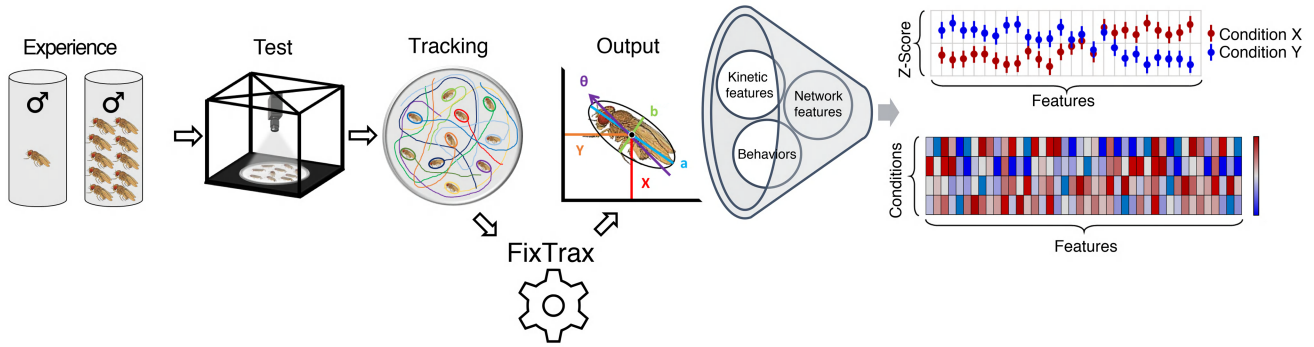

B.

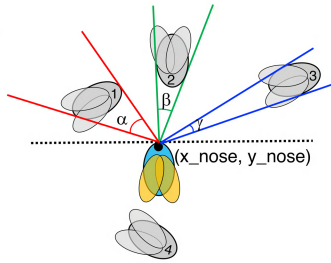

C.

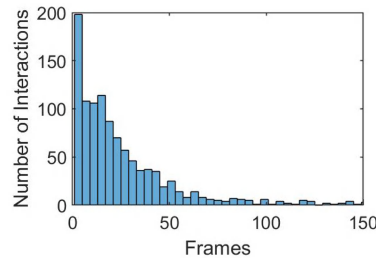

D.

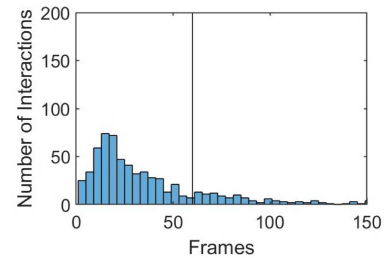

E.

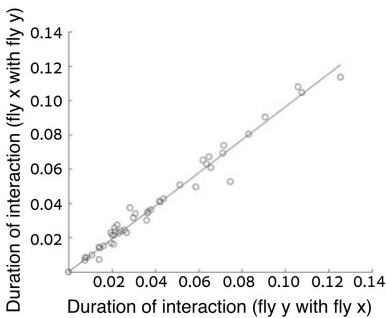

F.

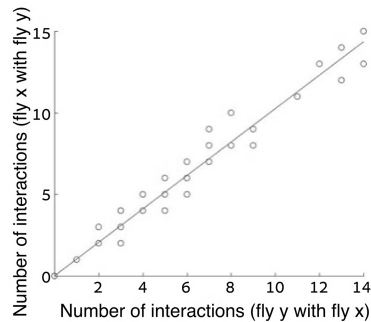

820

821

822

823

824

825

826

827

828

829

830

831

832

833

**Figure 1. A conceptual and experimental setup for studying complex behavior in groups of *Drosophila*.** A. Illustration of social conditioning, data capture and analysis. Naïve male flies were housed in groups of 10 flies or in isolation for 3 days and inserted in groups of 10 into Fly Bowl arenas, where their social interaction was recorded for 15 minutes (at 30fps). Tracking was performed using Ctrax. Error correction of Ctrax output data was performed using FixTRAX, generating an output file of position, angle and size per-fly per-frame. The fixed output file was used to calculate kinetic features, to classify specific behaviors using JAABA and to analyze social network structure. Group signature was generated by normalizing all features as a series of Z scores per condition (far right upper graph). Hierarchical clustering of conditions (y axis) and features (x axis) was performed using Partek and presented as heatmaps (far right lower graph). B. Illustration of the angle criteria used to define an interaction; angle subtended ( $\alpha$ ,  $\beta$  or  $\gamma$ )  $> 0$ . C-D. Total number of encounters as a function of encounter duration in representative movie of socially raised WT flies (C), and when adding a 60-frames gap requirement between interactions (D). Black line represents the threshold (60 frames) under which encounters are not considered interactions for network analysis. E. Directed interactions quantified as the total duration between each pair of flies. F. Directed interactions quantified as the total number of interactions between each pair of flies.

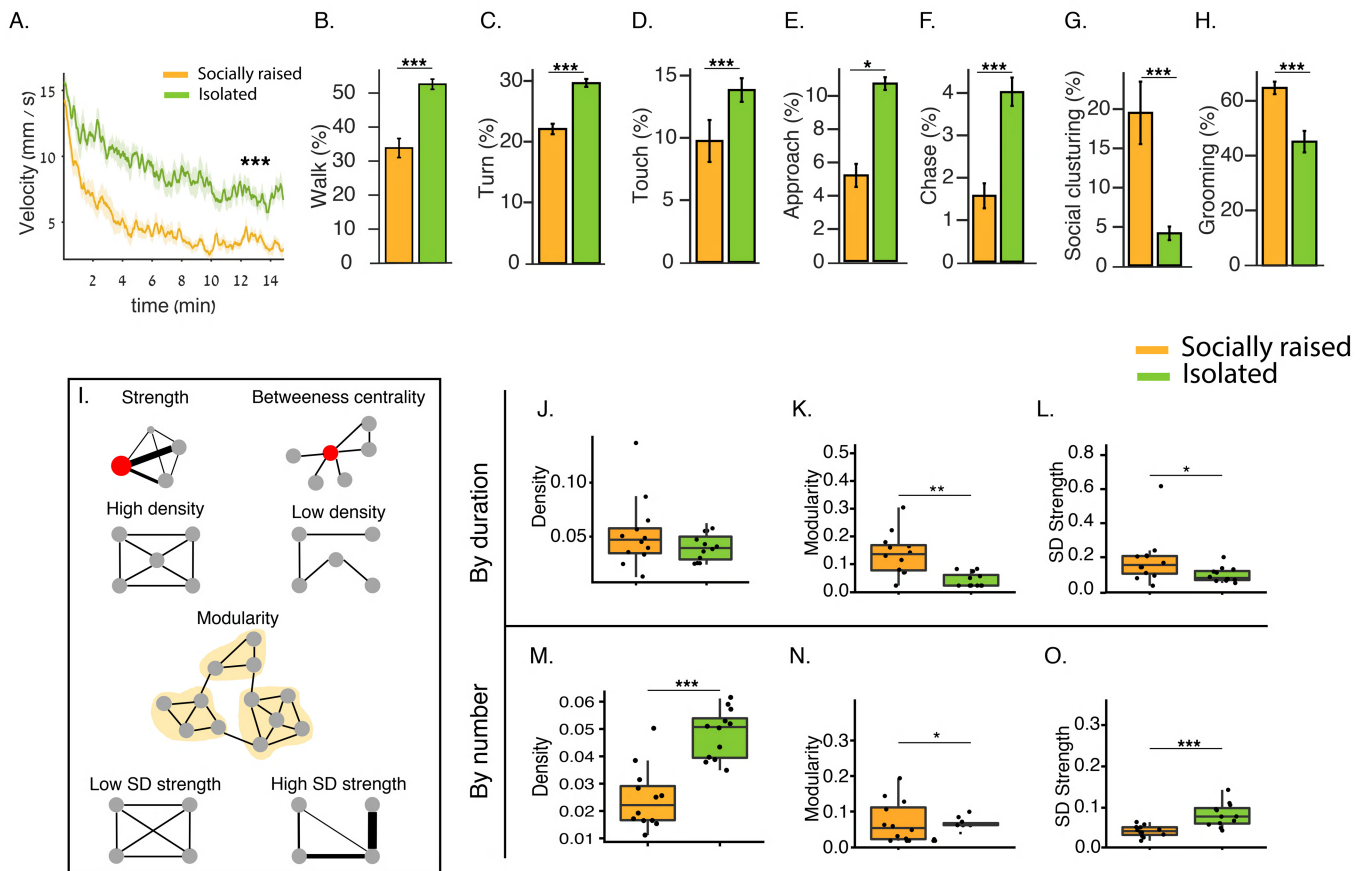

834

835 **Figure 2: Prior social interaction in a group facilitates the formation of ordered social structures.** A. Average velocity per-  
 836 frame of previously isolated male flies (green) vs. socially raised male flies (orange) over 15 minutes. B-H. Average percentage  
 837 of time previously isolated male flies (green) vs. socially raised male flies (orange) perform walk (B), turn (C), touch (D),  
 838 approach (E), chase (F), social clustering (G) and grooming (H) behaviors. I. Illustration of network parameters; Strength  
 839 is proportional to vertex size. Betweenness centrality is a measure of the tendency of the individual to serve as a hub connecting  
 840 different sub-groups (high in red individual). Density of networks represents how saturated they are compared to the maximum  
 841 possible. Modularity is a measure of the division of a network into sub-networks. Standard Deviation (SD) strength is a measure  
 842 of the heterogeneity of the connections between individuals. J-O. Network density, modularity and SD strength calculated by  
 843 network weights according to duration (J-L respectively) or number of interactions (M-O respectively) between previously  
 844 isolated (green) and socially raised (orange) WT male flies. N=18, Wilcoxon test and FDR correction for multiple tests \* P<0.05,  
 845 \*\* P<0.01, \*\*\* P<0.001. Error bars signify SEM.

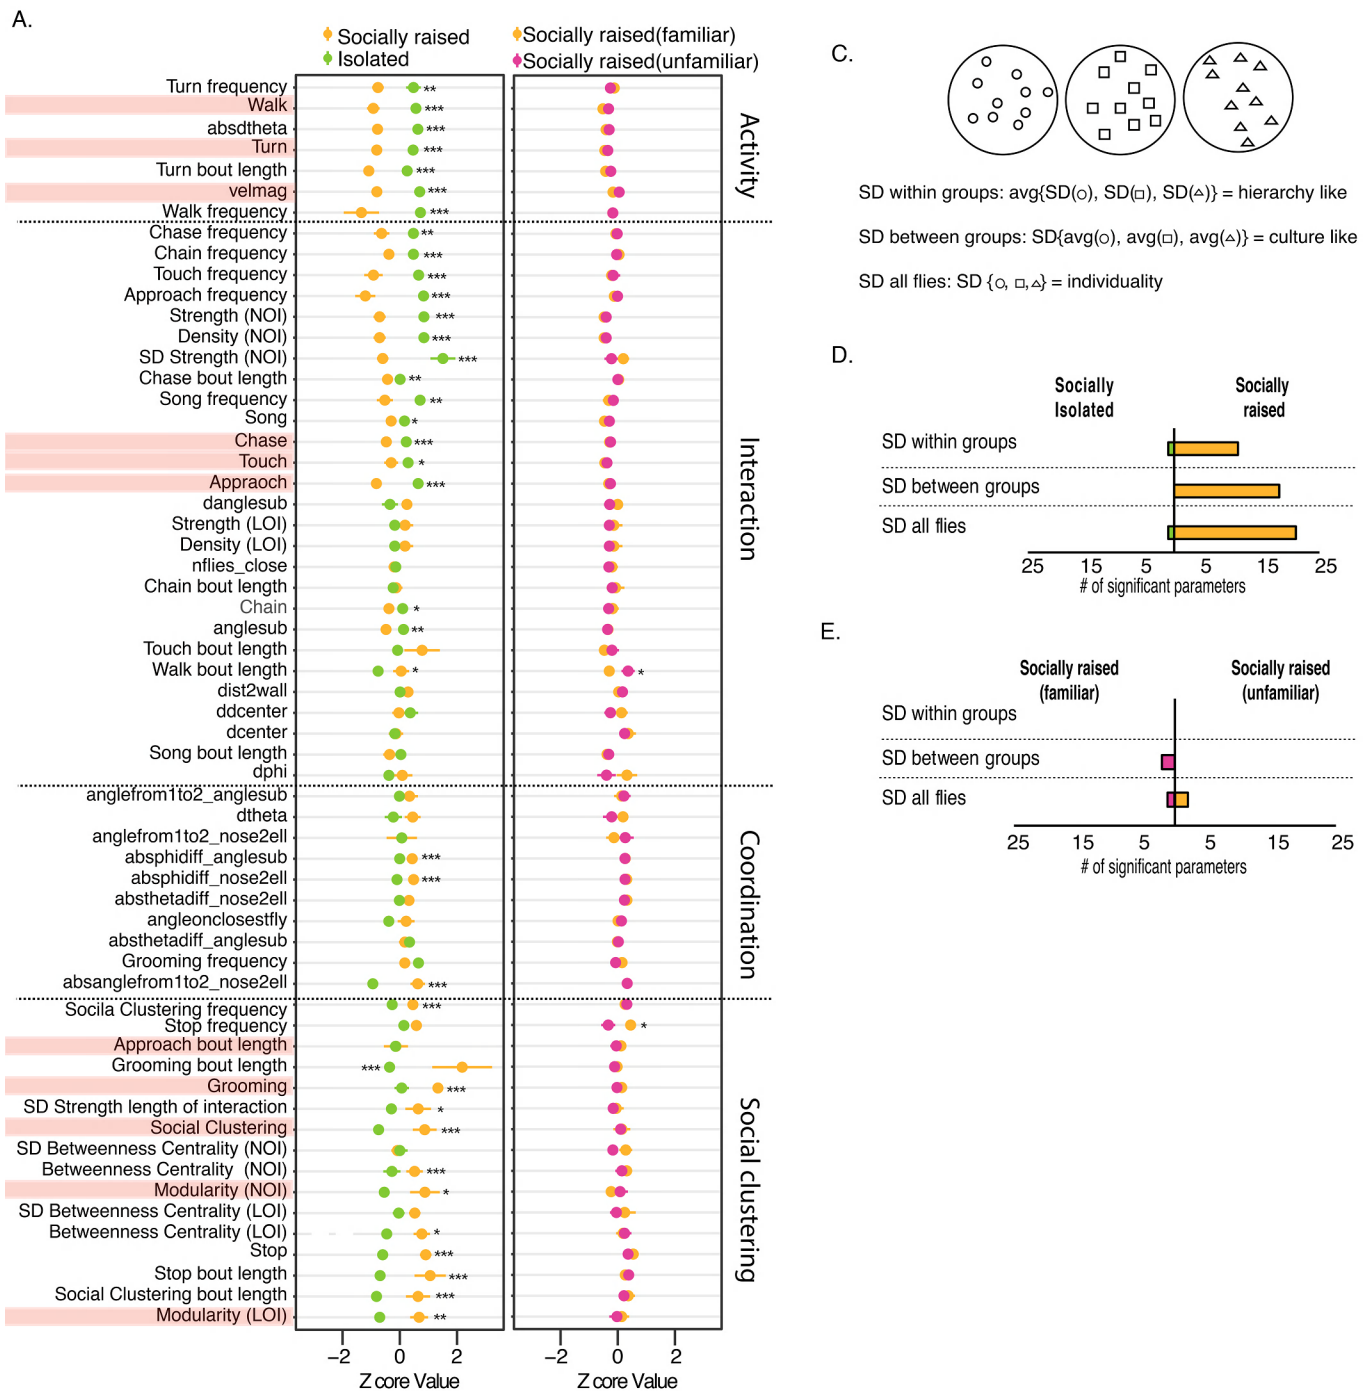

846

847 **Figure 3. Social experience facilitates distinct group signature and increases behavioral variability.** A-B. Behavioral  
 848 signatures of previously isolated vs. socially raised WT male flies (A) and familiar vs. unfamiliar raised WT flies (B). Data  
 849 is represented as normalized Z scores of 60 behavioral (A: N=18. B: N=25 t-test for normally distributed parameter or Wilcoxon  
 850 test for non-normally distributed parameters. P-values were corrected using FDR. \* P<0.05, \*\* P<0.01, \*\*\* P<0.001). Features  
 851 mentioned in the results section are highlighted in pink. C. Graphical illustration of measuring variance within groups, between  
 852 groups and across all individuals (all flies) in each condition. D-E. Number of behavioral features that display significantly  
 853 higher variance and their SD is at least two-fold higher when comparing isolated to raised (D) and familiar vs unfamiliar (E).  
 854 Statistical analysis was performed on SD of the entire population (all flies) (F test), SD of repetitions in each condition (between  
 855 groups) (F test) and average SD within each repetition per condition (inside groups) (t-test). P-values were corrected using  
 856 FDR. \*P<0.05, \*\*P<0.01, \*\*\*P<0.001. Error bars signify SEM.

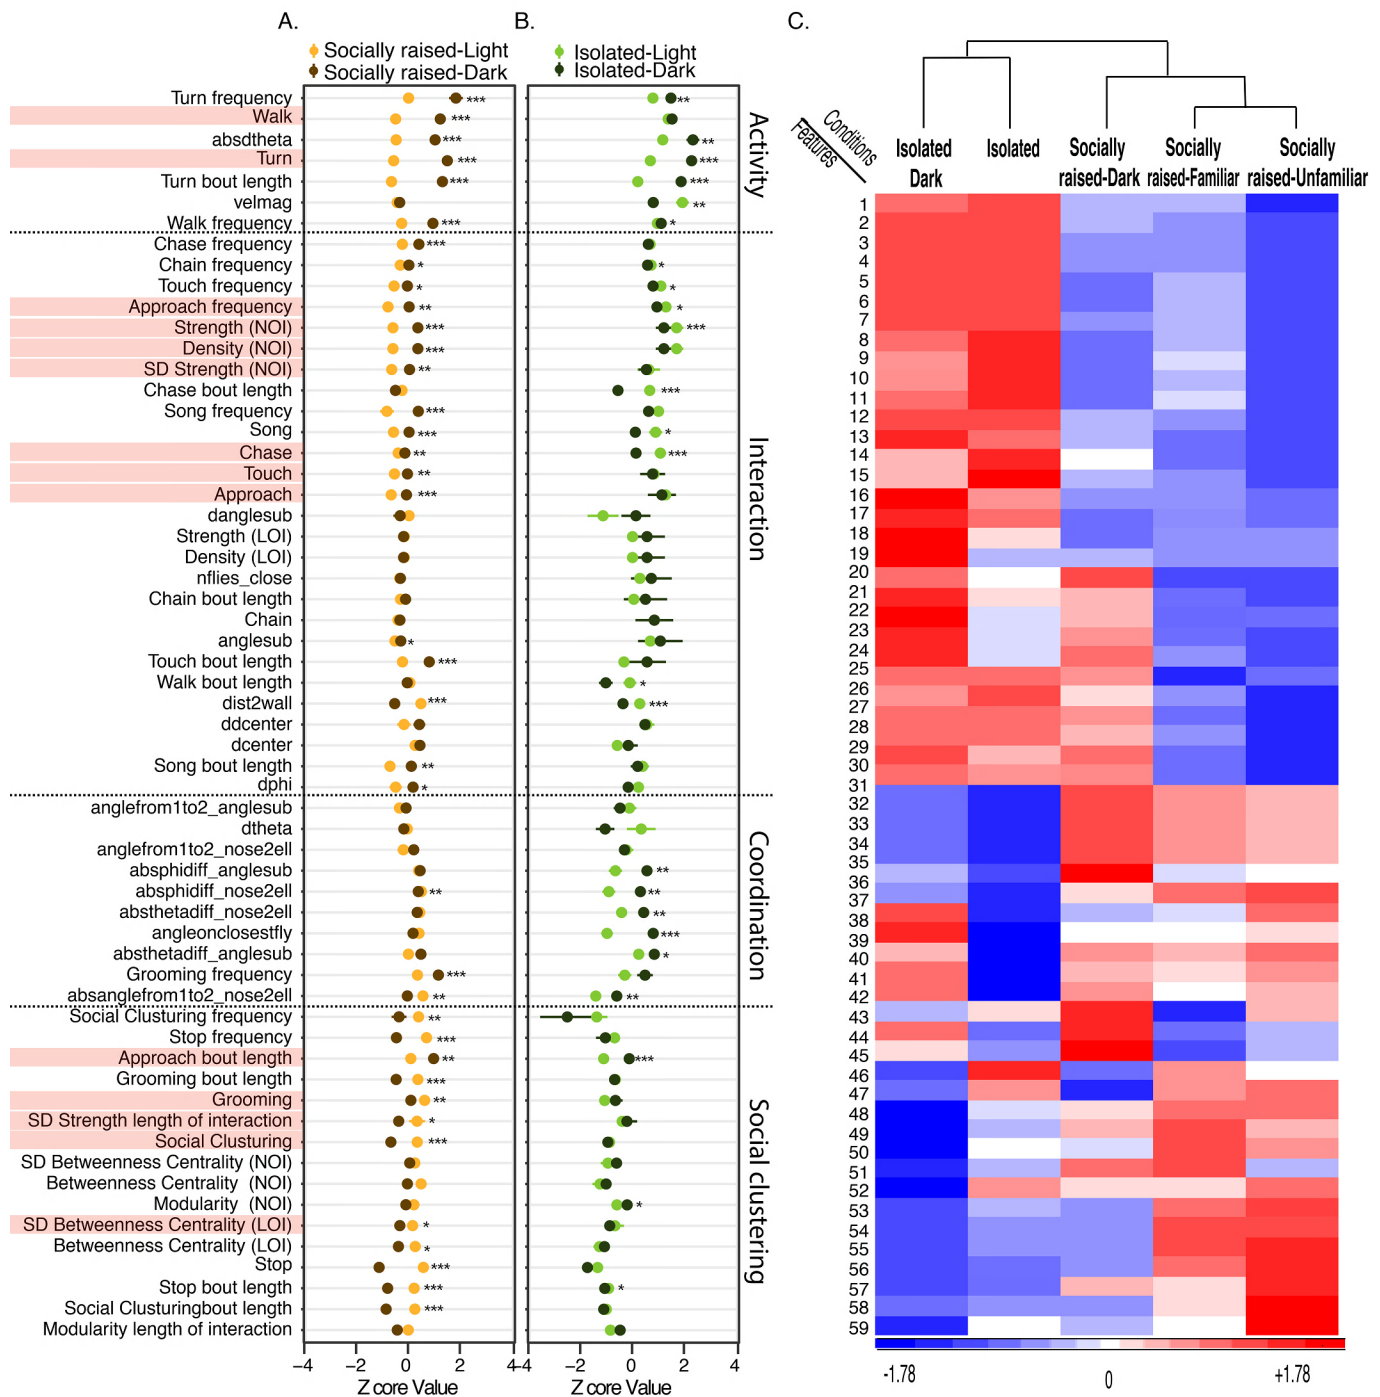

857

858 **Figure 4: Visual cues are necessary for expressing the behavioral signature of socially raised flies.** A-B. Behavioral group  
 859 signatures (represented as normalized z-scores) of socially raised (A) or previously isolated (B) WT male flies tested in normal  
 860 lighting conditions (light) vs. light deprivation (dark). LOI - calculated according to the length of interactions. NOI - calculated  
 861 according to the number of interactions. N=18 and 10, respectively. t-test for normally distributed parameters or Wilcoxon test  
 862 for non-normally distributed parameters. P-values were corrected using FDR. \*P<0.05, \*\*P<0.01, \*\*\*P<0.001. Error bars  
 863 signify SEM. Features mentioned in the results section are highlighted in pink. C. Hierarchical clustering (dendrogram) of group  
 864 signatures of the following experimental conditions: socially raised (raised familiar), unfamiliar socially raised (raised  
 865 unfamiliar), socially raised tested in dark (raised dark), socially isolated tested in light (isolated) and socially isolated tested in  
 866 dark (isolated dark). List of numbers represent behavioral features. Full list in Fig. S4B.

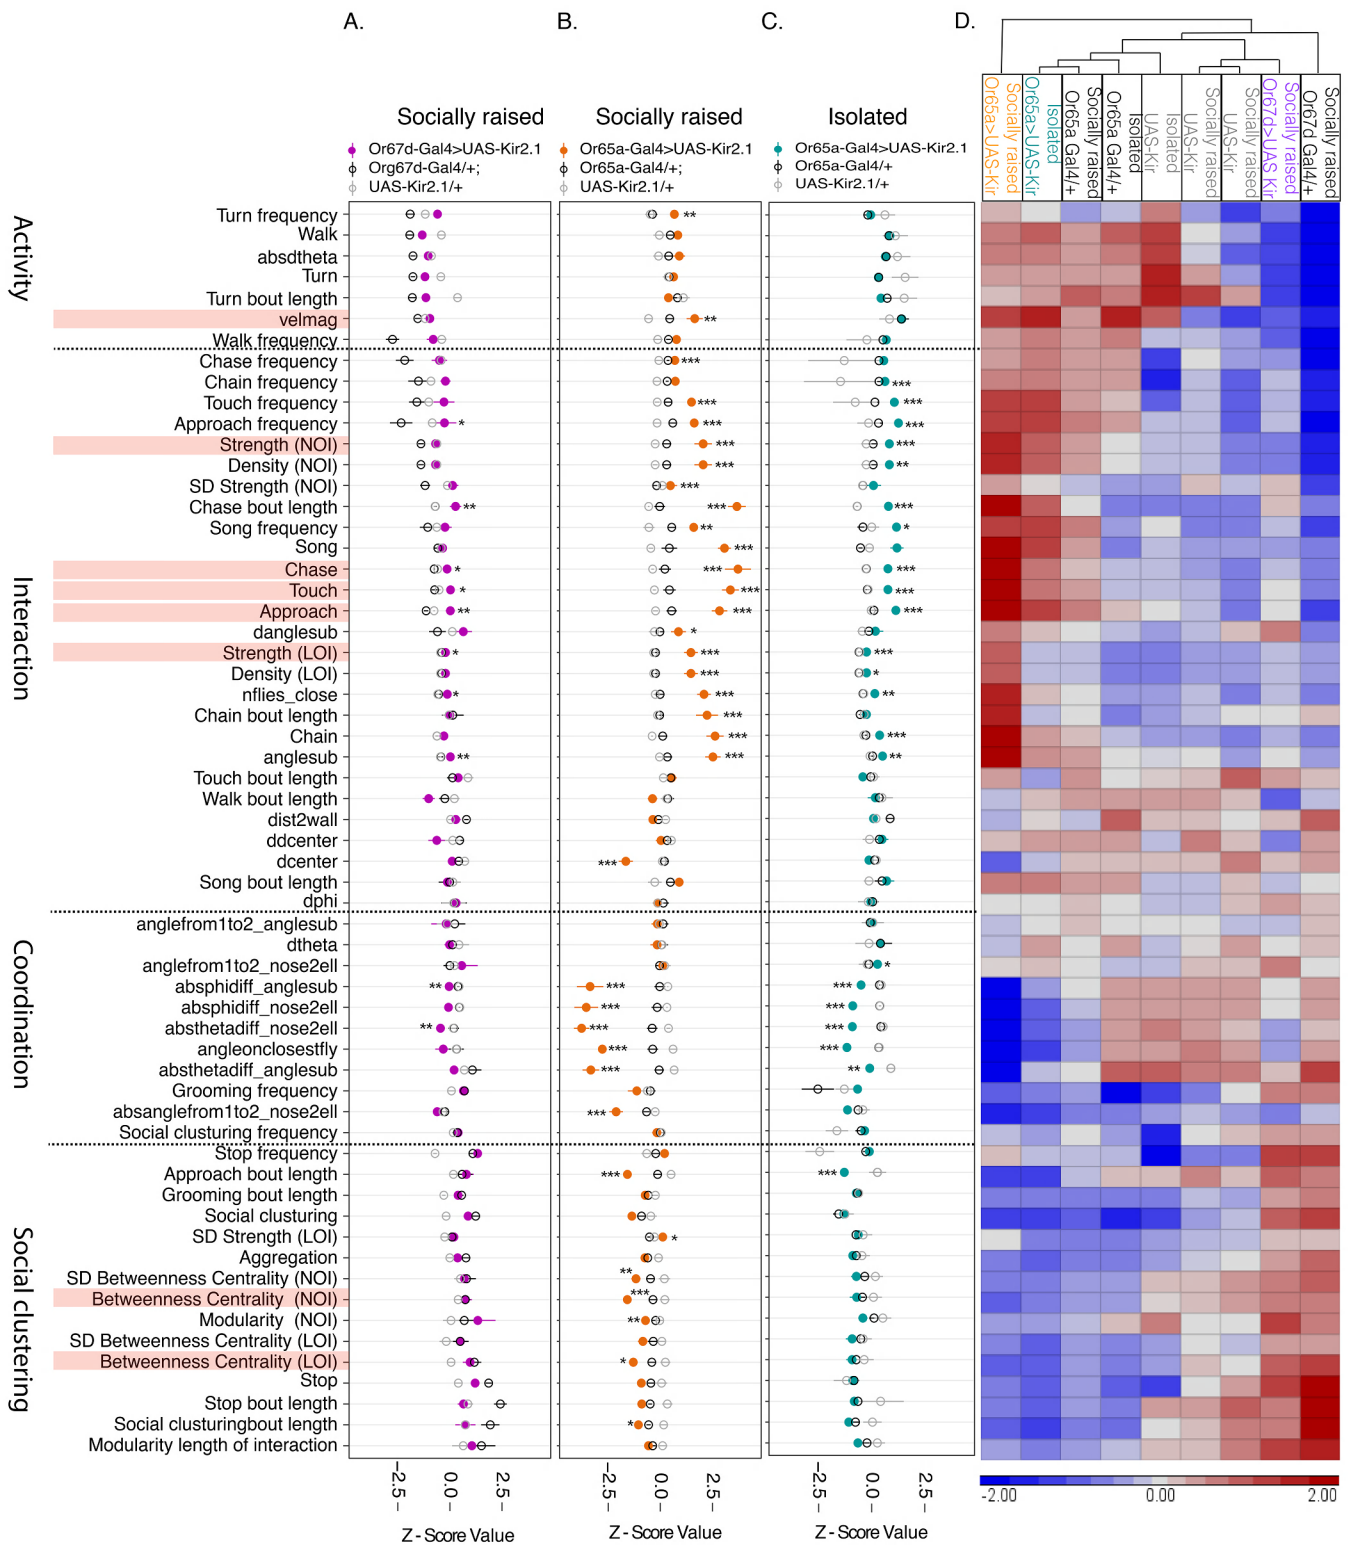

867

868 **Figure 5. cVA sensing via Or65a neurons shapes social group interaction.** A-C. Behavioral group signatures (as normalized  
 869 z scores) of socially raised Or67d-Gal4/+; UAS-Kir2.1/+ flies compared to genetic controls (A), of socially raised Or65a-Gal4/+;  
 870 UAS-Kir2.1/+ flies compared to genetic controls (B) and of previously isolated Or65a-Gal4/+; UAS-Kir2.1/+ flies compared to  
 871 genetic controls (C). LOI - calculated according to the length of interactions. NOI - calculated according to the number of  
 872 interactions. N=7, 13, and 8 respectively. One-way ANOVA with Tukey's range test for normally distributed features or Kruskal  
 873 Wallis followed by Wilcoxon signed-rank test for non-normally distributed features. P-values were corrected using FDR.  
 874 \*P<0.05, \*\*P<0.01, \*\*\*P<0.001. Error bars signify SEM. Features mentioned in the results section are highlighted in pink. D.  
 875 Hierarchical clustering (dendrogram) of behavioral group signatures of all experimental conditions in A-C.

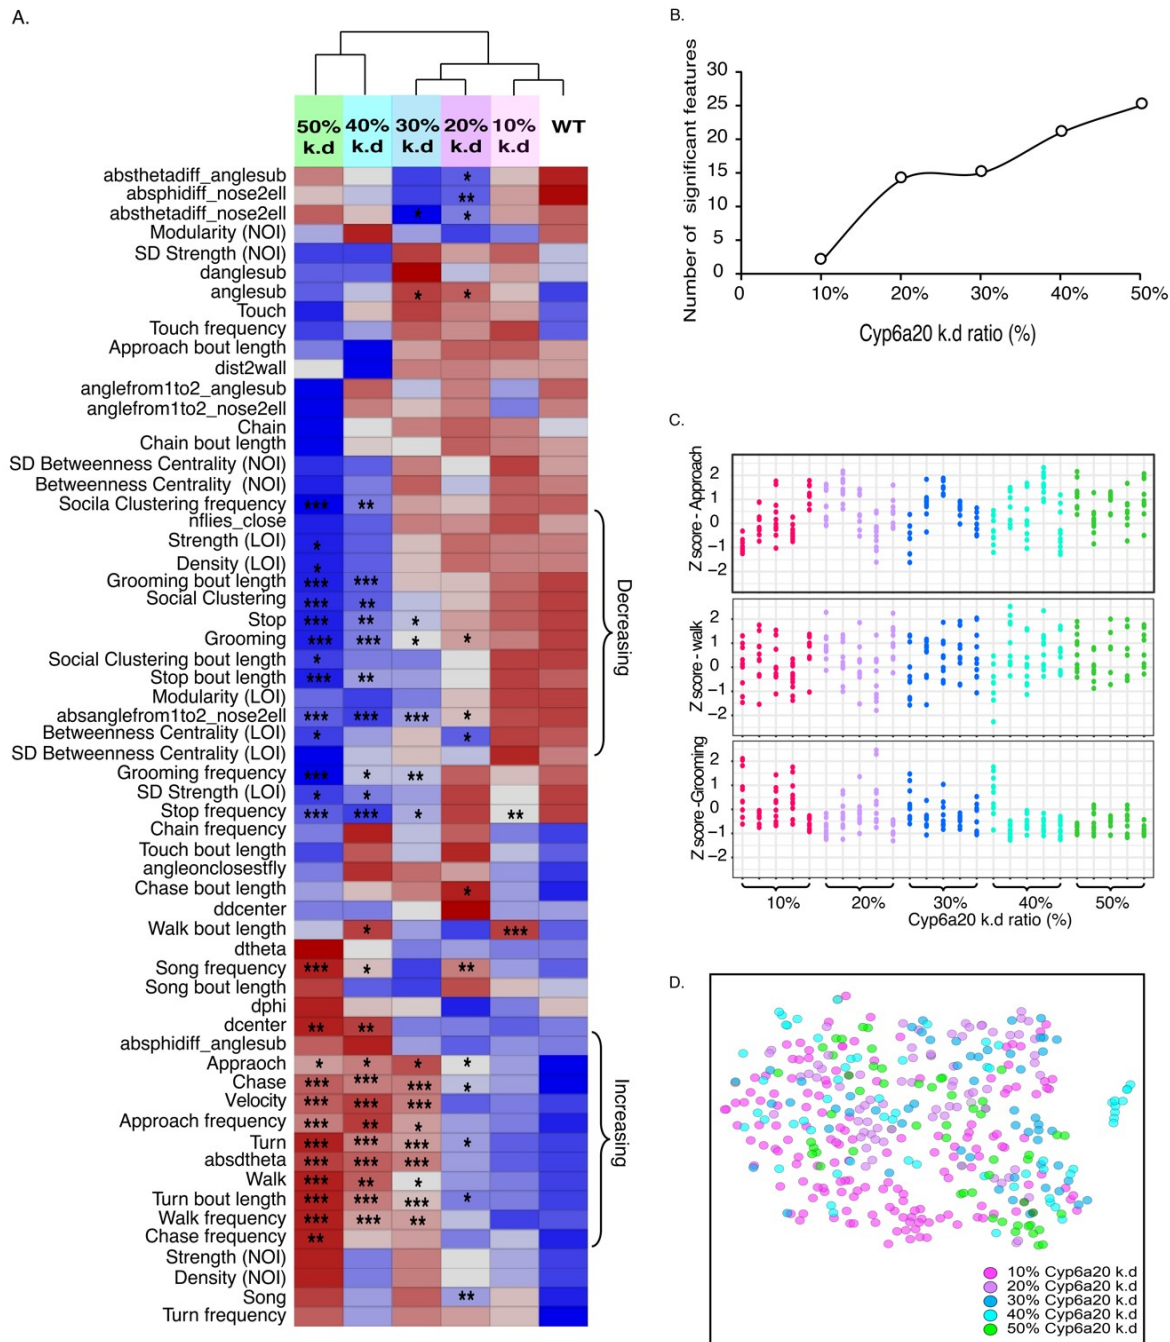

876 **Figure 6. Sub populations of aggressive flies in a group affect different features of group behavior.** A. Hierarchical  
 877 clustering of behavioral signatures of groups composed of different ratios of socially isolated *Cyp6a20-Gal4/+; UAS-Cyp6a20-*  
 878 *RNAi/+* and socially raised WT flies (0-50%). LOI - calculated according to the length of interactions. NOI - calculated according  
 879 to the number of interactions. Data of each experimental group was normalized to a WT control group which was tested at the  
 880 same time. To compare log-ratios of means (test/control), all values were log<sub>2</sub>-transformed and statistically tested as mean log-  
 881 values. The effect of treatment and mutant number on the fraction of each parameter was tested with a linear regression and a 2-  
 882 way ANOVA was performed on the resulting model. Log-ratios between different number of mutants were compared in terms  
 883 of difference of differences defined with by linear contrasts, FDR correction was applied to all comparisons. \* P<0.05, \*\* P<0.01,  
 884 \*\*\* P<0.001 N=14, 8, and 6 for groups of 10%, 20-30% and 40-50%, respectively. B. Number of significantly different  
 885 behavioral features compared to controls as a function of the ratio of isolated *Cyp6a20* k.d - to raised WT flies in a group (10-  
 886 50%). C. Per-fly distribution of three normalized behavioral features (interaction, walk, grooming) in groups containing  
 887 increasing ratios (0-50%) of isolated *Cyp6a20* k.d to socially raised WT flies. Each column represents individuals as dots in one  
 888 movie. Analysis of the distribution inside each group is not significantly different between conditions (F test, n.s.) D. t-SNE  
 889 analysis of all individuals in 10-50% groups across all behavioral features.

| Definition               | Description                                                                                                                      | Definition                                                  | Description                                                                                                                |
|--------------------------|----------------------------------------------------------------------------------------------------------------------------------|-------------------------------------------------------------|----------------------------------------------------------------------------------------------------------------------------|
| dnose2ell                | Minimum distance from any point of this animal nose to the ellipse of other flies.                                               | Walk                                                        | Fly moves.                                                                                                                 |
| absanglefrom1to2nose2ell | Absolute difference between direction to closest animal based on dnose2ell and current animal's orientation (rad).               | Stop                                                        | Fly is still.                                                                                                              |
|                          |                                                                                                                                  | Turn                                                        | Changes in fly's direction.                                                                                                |
| absdtheta                | Angular speed (rad/s).                                                                                                           | Touch                                                       | Fly actively touches another fly.                                                                                          |
| absphidiffanglesub       | Absolute difference in velocity direction between current animal and closest animal based on anglesub (rad).                     | Approach                                                    | Fly approaches another fly and perform interaction (active or passive).                                                    |
|                          |                                                                                                                                  | Aggregation                                                 | Fly sits in a group of 3 or more flies.                                                                                    |
| absphidiffnose2ell       | Absolute difference in velocity direction between current animal and closest animal based on dnose2ell (rad).                    | Grooming                                                    | Fly grooms.                                                                                                                |
|                          |                                                                                                                                  | Chase                                                       | Fly chases another fly.                                                                                                    |
| absthetadiffanglesub     | Absolute difference in orientation between current animal and closest animal based on anglesub (rad).                            | Chain                                                       | Chase with 3 or more flies.                                                                                                |
|                          |                                                                                                                                  | Song                                                        | Fly moves one wing next to another fly.                                                                                    |
| absthetadiffnose2ell     | Absolute difference in orientation between this animal and closest animal based on dnose2ell (rad).                              | Behavior bout length                                        | Length of the longest sequence of frames in which the behavior occurred per fly.                                           |
|                          |                                                                                                                                  | Behavior frequency                                          | Length of the movie minus the length of the longest sequence of frames in which the behavior didn't occurred for each fly. |
| anglefrom1to2anglesub    | Angle to closest (based on angle subtended) animal's centroid in current animal's coordinate system (rad).                       | Density SD by length of interactions (LOI)                  | Accumulated interactions' length relative to the maximum interactions' length possible.                                    |
| anglefrom1to2nose2ell    | Angle to closest (based on distance from nose to ellipse) animal's centroid in current animal's coordinate system (rad).         | Modularity by length of interactions (LOI)                  | Representation of how much the network is divided into modules according to interactions' length.                          |
|                          |                                                                                                                                  | Strength by length of interactions (LOI)                    | Length of interactions of a certain fly.                                                                                   |
| angleonclosestfly        | Angle of the current animal's centroid in the closest (based on distance from nose to ellipse) animal's coordinate system (rad). | SD Strength according to length of interactions (LOI)       | Standard deviation of the strengths according to interactions' length of flies from the same movie.                        |
|                          |                                                                                                                                  | Betweenness Centrality by length of interactions (LOI)      | A measure of centrality of a certain fly based on shortest paths according to interactions' length.                        |
| anglesub                 | Maximum total angle of animal's field of view (fov) occluded by another animal (rad).                                            | SD Betweenness Centrality by length of interactions (LOI)   | Standard deviation of the betweenness centralities according to interactions' length of flies from the same movie.         |
| danglesub                | Change in maximum total angle of animal's view occluded by another animal (rad/s).                                               | Density by number of interactions (NOI)                     | Interactions' number relative to the maximum interactions' number possible.                                                |
| dcenter                  | Minimum distance from this animal's center to other animal's center (mm).                                                        | Modularity Strength by number of interactions (NOI)         | Representation of how much the network is divided into modules according to interactions' number.                          |
| ddcenter                 | Change in minimum distance between this animal's center and other flies' centers (mm/s).                                         | Strength by number of interactions (NOI)                    | Number of interactions of a certain fly.                                                                                   |
| dist2wall                | Distance to the arena wall from the animal's center (mm).                                                                        | SD Strength by number of interactions (NOI)                 | Standard deviation of the strengths according to interactions' number of flies from the same movie.                        |
| dphi                     | Change in the velocity direction (rad/s).                                                                                        | Betweenness Centrality by number of interactions (NOI)      | A measure of centrality of a certain fly based on shortest paths according to interactions' number.                        |
| dtheta                   | Angular velocity (rad/s).                                                                                                        |                                                             |                                                                                                                            |
| nflies_close             | Number of flies within 2 body lengths (4a).                                                                                      | SD Betweenness centrality (by number of interactions (NOI)) | Variance of the betweenness centralities according to interactions' number of flies from the same movie.                   |
| velmag                   | Speed of the center of rotation (mm/s).                                                                                          |                                                             |                                                                                                                            |

890 **Table S1:** Definitions of behavioral features used in this work. Kinetic (red) features were obtained from Kabra et al. Classified  
891 behavioral features (blue) were generated using JAABA. Network (green) features were calculated in R using i graph.



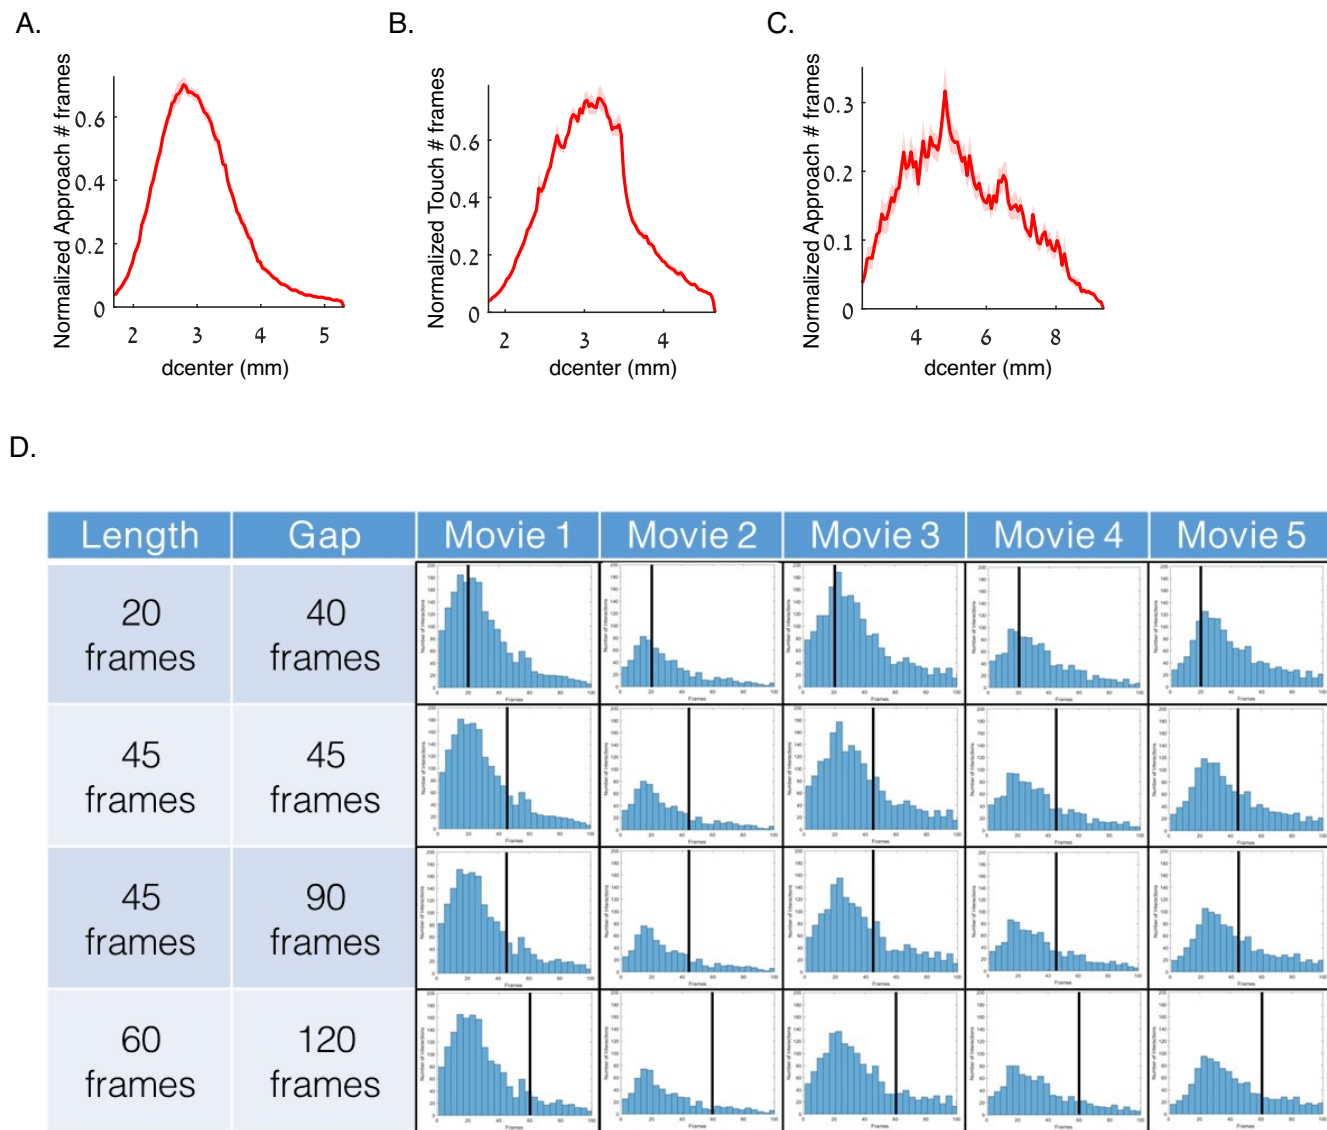

892 **Figure S1. Defining interaction distance, duration and gap thresholds affects the number of very short interactions.** A-C.  
 893 Distribution of normalized number of frames according to the distance between the fly center to another fly center (dcenter) in  
 894 which approach (A), touch (B) and social clustering (C) as quantified using JAABA. Light red signifies SE. N= 39. D. Number  
 895 of encounters that meet the minimal distance and angle requirements for interaction as a function of encounter duration in five  
 896 movies, with different combinations of duration and gap parameters (20-60 frames/0.4-2 sec and 40-120 frames/1.2-4 sec  
 897 respectively). Each row represents a combination of duration and gap values. Each column represents one movie. Black lines  
 898 represent the minimal threshold for an interaction according to the specific duration parameter.

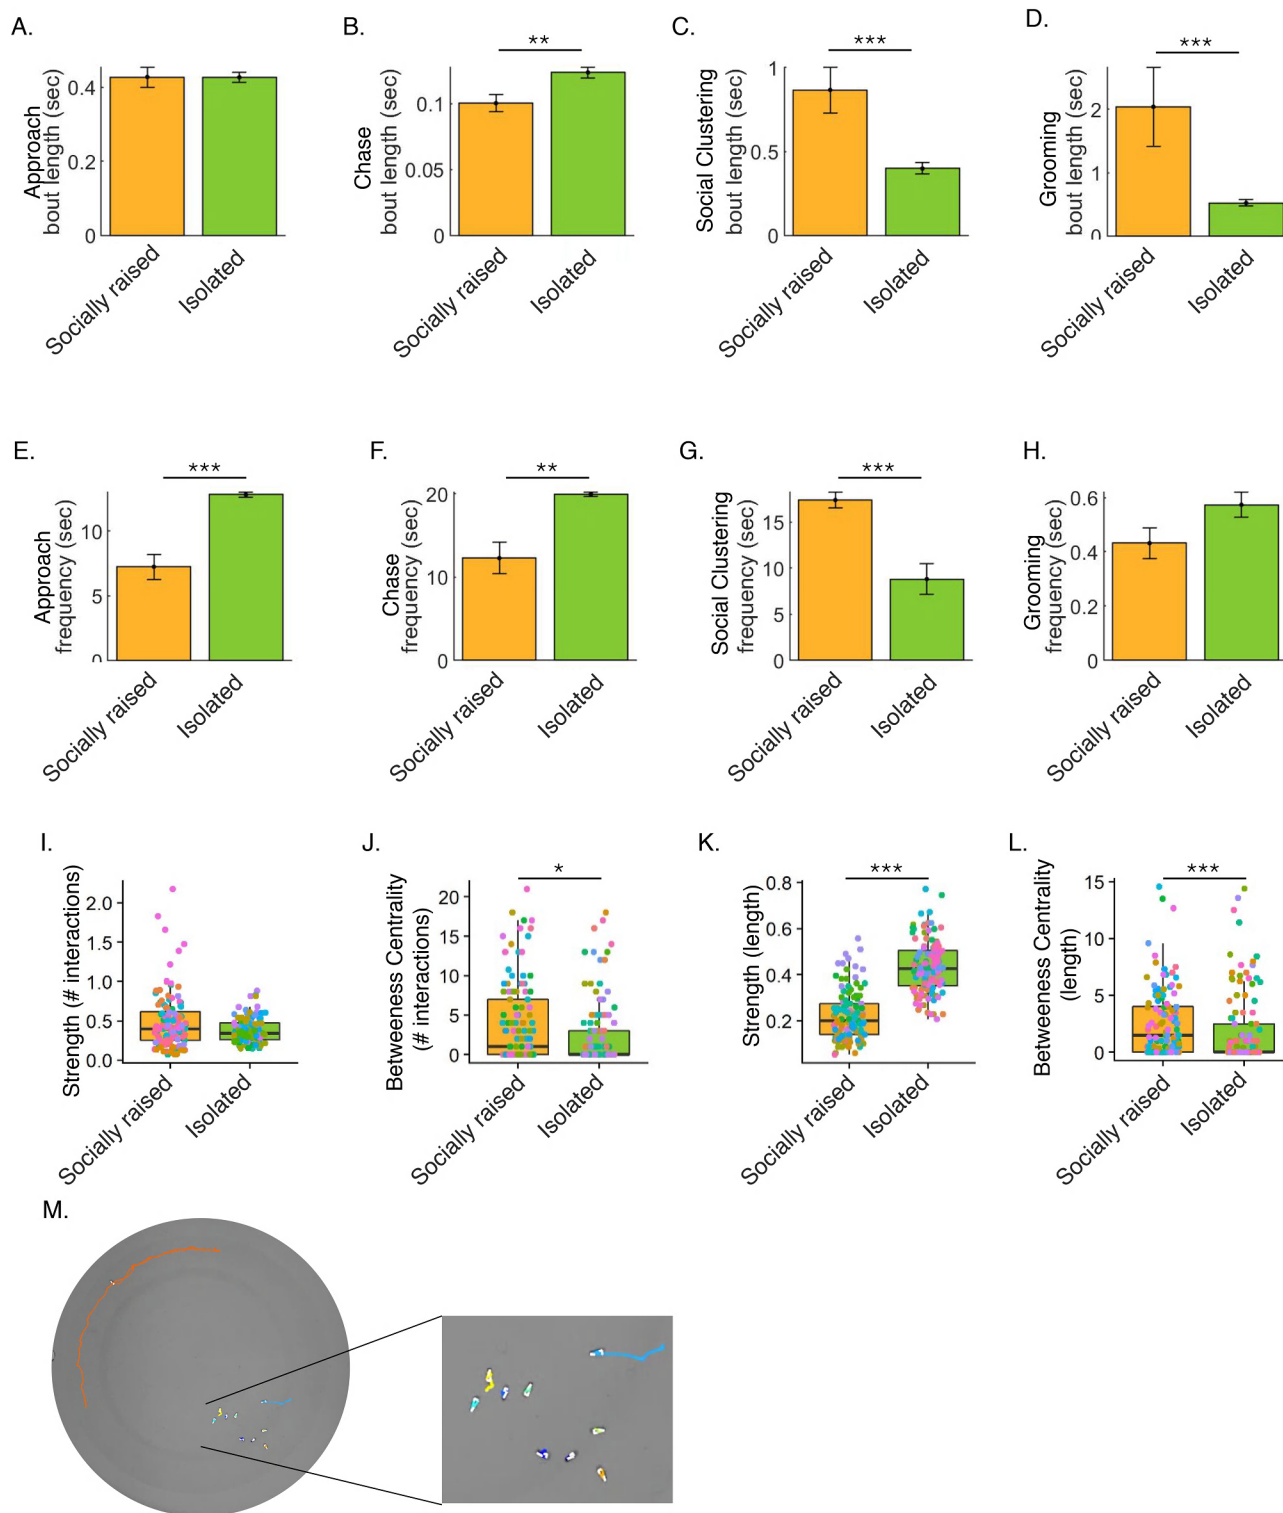

899

900 **Figure S2. Prior social experience affects bout-length and frequency of specific behaviors and changes network structure.**

901 A-H: Average bout-length (A-D) and frequency (E-H) of specific behaviors (Interaction, Chase, Social clustering and Grooming,  
 902 respectively) of socially raised (orange) vs. isolated (green) WT male flies. I-L: Per-fly network features (Strength and  
 903 Betweenness Centrality) in which network weights were calculated according to duration of interactions (I-J) or number of  
 904 interactions (K-L) between socially raised (orange) vs isolated (green) WT male flies. t-test for normally distributed features or  
 905 Wilcoxon test for non-normally distributed features. FDR correction was applied to all comparisons. N=18, \* P<0.05, \*\* P<0.01,  
 906 \*\*\* P<0.001. Error bars signify SEM. M: Picture of a social clustering event, performed by socially raised WT male flies within  
 907 a FlyBowl arena, colored lined represent tracking trajectories over the next 60 frames/2 sec.

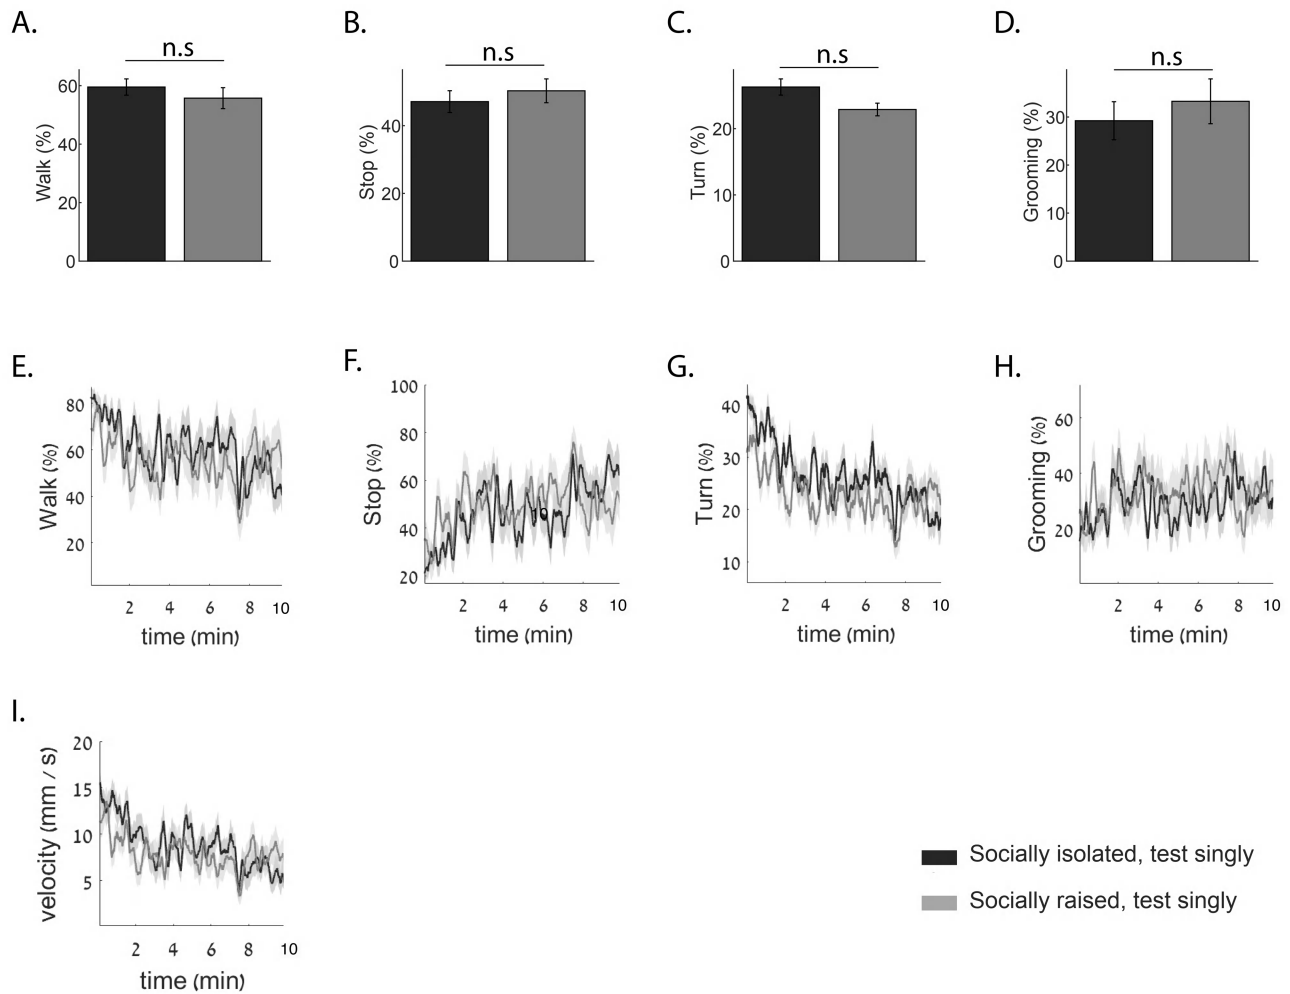

908

909 **Figure S3. Prior social experience does not affect the behavior of flies tested singly.** A-H: Average percentage of time and  
910 per-frame averages of previously isolated male flies (black) vs. socially raised male flies (gray) that perform walk (A, E), stop  
911 (B, F), turn (C, G) and Grooming (D, H) behaviors. I. average velocity per-frame of previously isolated male flies (black) vs.  
912 socially raised male flies (gray). Wilcoxon test  $P > 0.05$   $N = 17$ .

A.

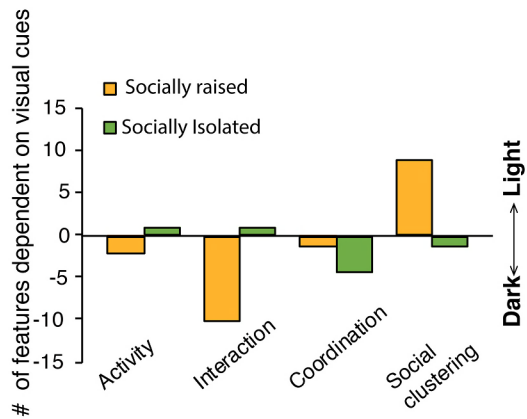

B.

Features in heatmap, Fig. 4 C

- 1 Density length of interaction
- 2 Strength length of interaction
- 3 Chain bout length
- 4 anglesub
- 5 Chain
- 6 nflies\_close
- 7 dcenter
- 8 Walk frequency
- 9 Walk
- 10 Song frequency
- 11 Chase frequency
- 12 Song bout length
- 13 absthetadiff\_anglesub
- 14 absdtheta
- 15 Turn
- 16 Turn bout length
- 17 Turn frequency
- 18 Touch
- 19 Density # of interaction
- 20 Strength # of interaction
- 21 Interaction frequency
- 22 Approach
- 23 Chain frequency
- 24 Touch frequency
- 25 Song
- 26 Chase
- 27 SD Strength #of interaction
- 28 velocity
- 29 Grooming frequency
- 30 Touch bout length
- 31 dphi
- 32 Approach bout length
- 33 dcenter
- 34 danglesub
- 35 angleonclosestfly
- 36 absphidiff\_nose2ell
- 37 absphidiff\_anglesub
- 38 absthetadiff\_nose2ell
- 39 dtheta
- 40 anglefrom1to2\_nose2ell
- 41 Walk bout length
- 42 anglefrom1to2\_anglesub
- 43 Social clustering frequency
- 44 Grooming
- 45 Centrality #of interaction
- 46 Modularity length of interaction
- 47 Modularity number of interaction
- 48 absanglefrom1to2\_nose2ell
- 49 Grooming bout length
- 50 SD Strength length of interaction
- 51 Centrality length of interaction
- 52 Centrality #of interaction
- 53 Social clustering
- 54 Stop bout length
- 55 Social clustering bout length
- 56 Stop
- 57 Stop frequency
- 58 Centrality length of interaction
- 59 dist2wall

913

914 **Figure S4. The behavioral signature of socially raised flies displays a higher dependency on visual cues.** A. Number of  
 915 behavioral features that display significantly higher scores in either dark (negative y axis) or light (positive y axis) per condition  
 916 (isolated-green or raised-orange), divided into 4 categories; activity, interaction, coordination and social clustering related  
 917 features. B. list of corresponding behavioral features from Fig. 4C.

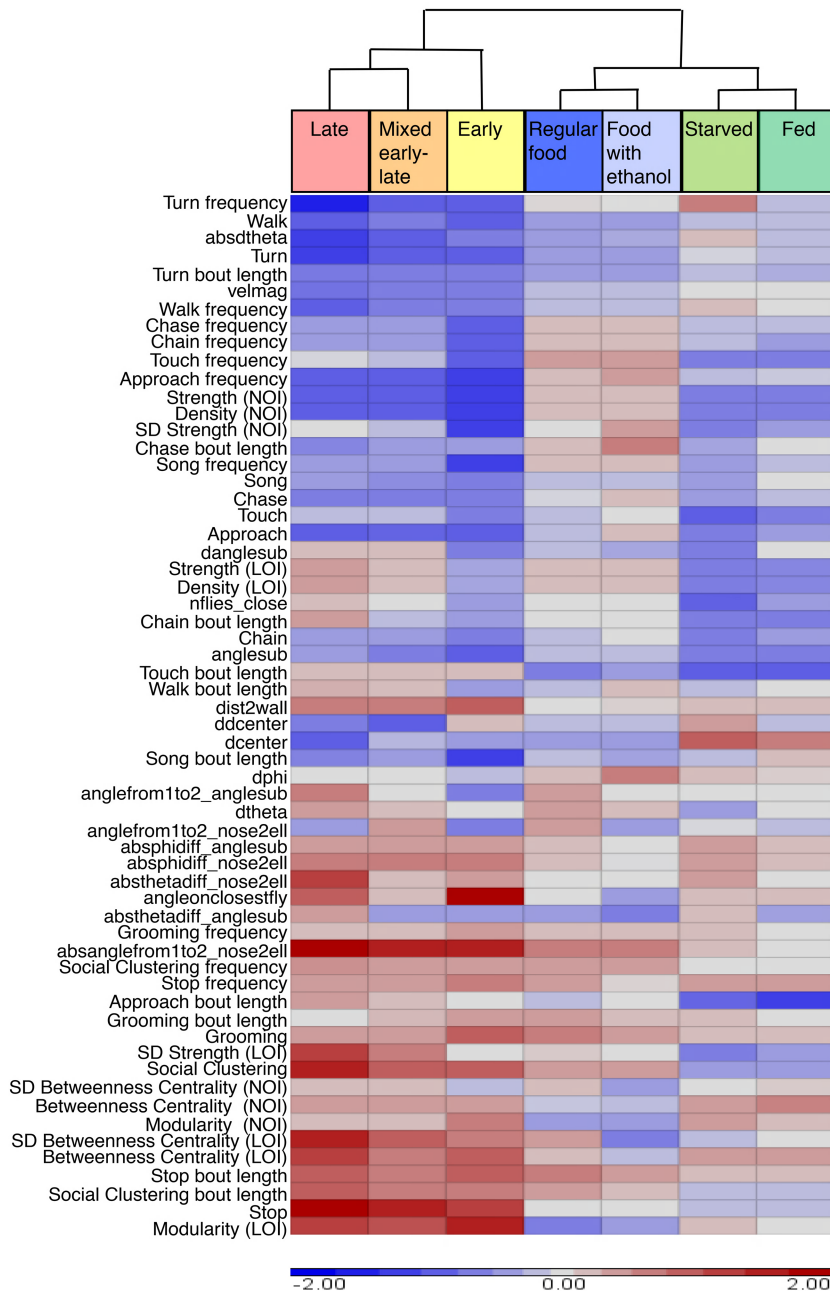

918

919 **Figure S5. Different internal motivational states in socially raised flies do not affect group signatures.** Socially raised flies  
 920 which were starved for 24 hours prior to behavioral test (fed/starved), exposed to ethanol for 3 days prior to behavioral test (food  
 921 with ethanol/regular food) or tested at different times during the day (early/mixed/late) do not display any differences in group  
 922 behavior, compared with controls. Hierarchical clustering of conditions reveals a similarity between each experimental group  
 923 and its control group (left, hierarchy tree). LOI - calculated according to the length of interactions. NOI - calculated according  
 924 to the number of interactions. t-test for normally distributed parameter or Wilcoxon test for non-normally distributed parameters  
 925 in starvation and ethanol experiments. One-way ANOVA with Bonferroni post hoc test for normally distributed parameters or  
 926 Kruskal Wallis followed by Wilcoxon signed-rank test for non-normally distributed parameters in different times experiment.  
 927 FDR correction was applied to all comparisons. N=13, 14 and 6 for ethanol, starvation and time difference tests respectively,  
 928 P>0.05, n.s.

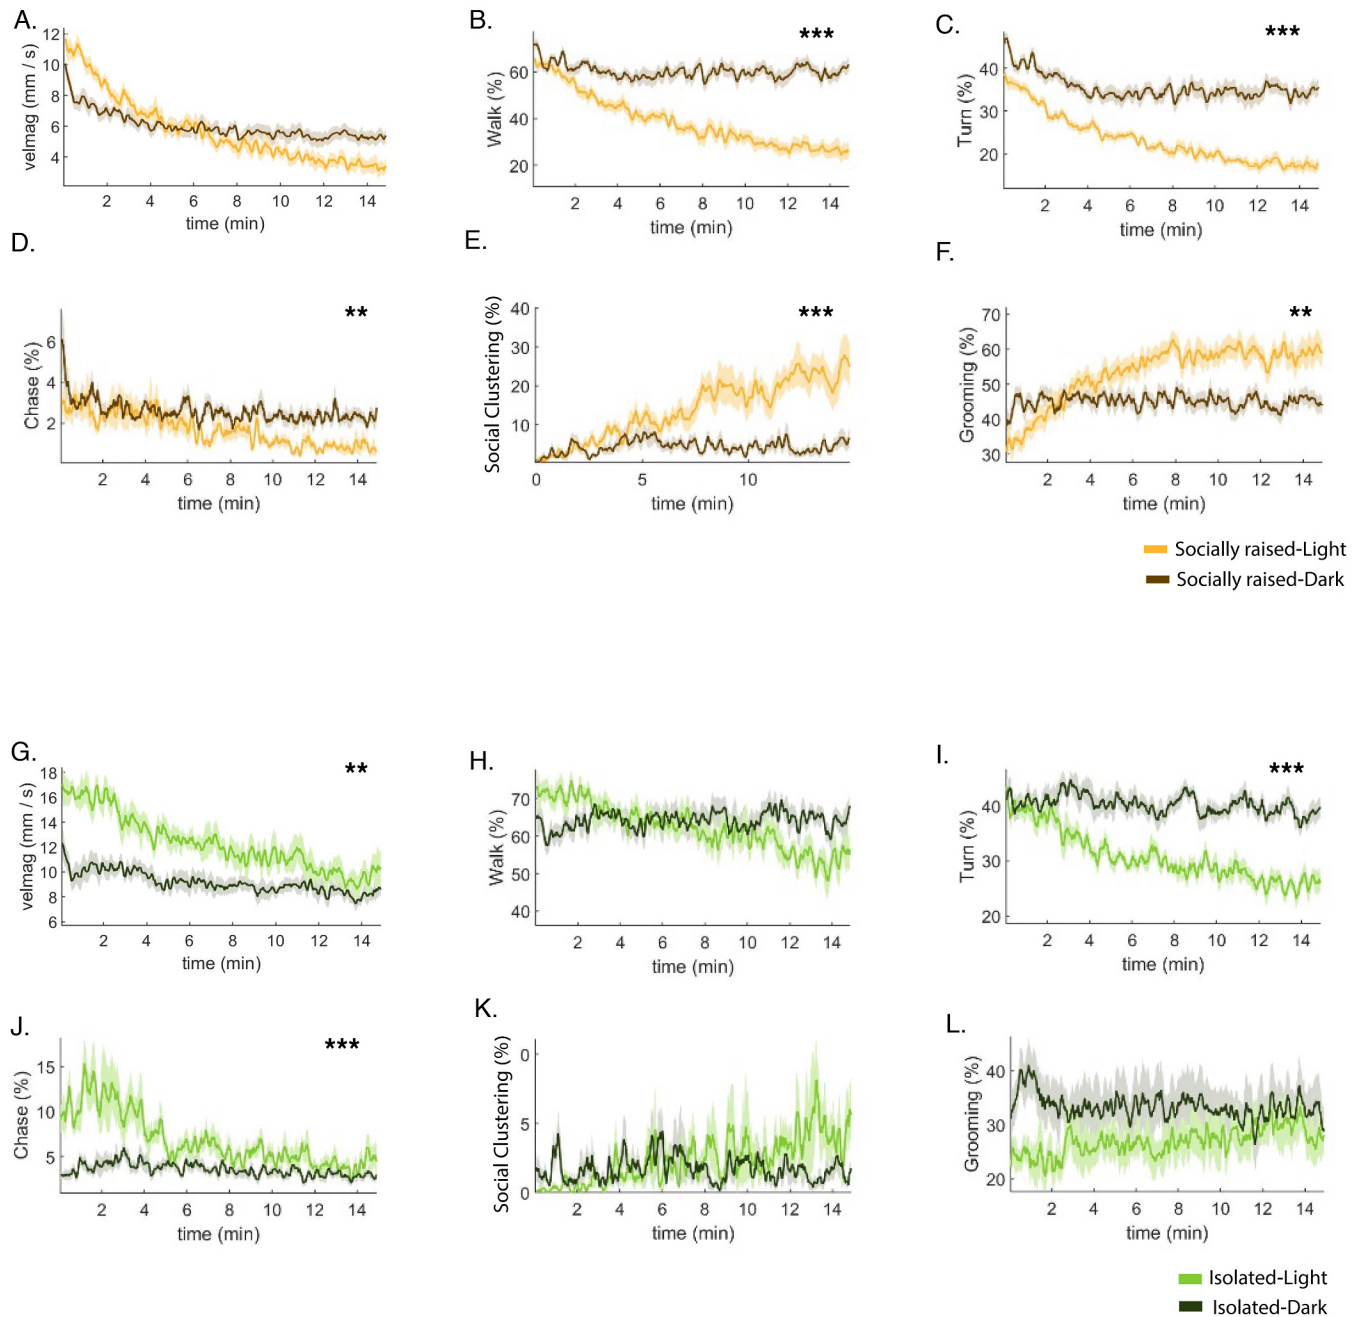

929

930 **Figure S6. Visual cues are required for habituation during test.** A-F: Average per-frame of velocity (velmag), walk, turn,  
 931 chase, social clustering and grooming of socially raised WT male flies tested in normal lighting (raised light - orange) or in the  
 932 dark (raised dark - brown). G-L: Average per-frame of velocity (velmag), walk, turn, chase, social clustering and grooming of  
 933 socially isolated WT male flies tested in normal lighting or in the dark. Statistical analysis was performed on the average of each  
 934 behavior for the entire duration of the test (15 min). t-test for normally distributed features or Wilcoxon test for non-normally  
 935 distributed features. FDR correction for multiple testing was performed for all analyses. N=18 for raised and N=11 for isolated  
 936 experiments, \*\* P<0.01, \*\*\* P<0.001. Error bars signify SEM.

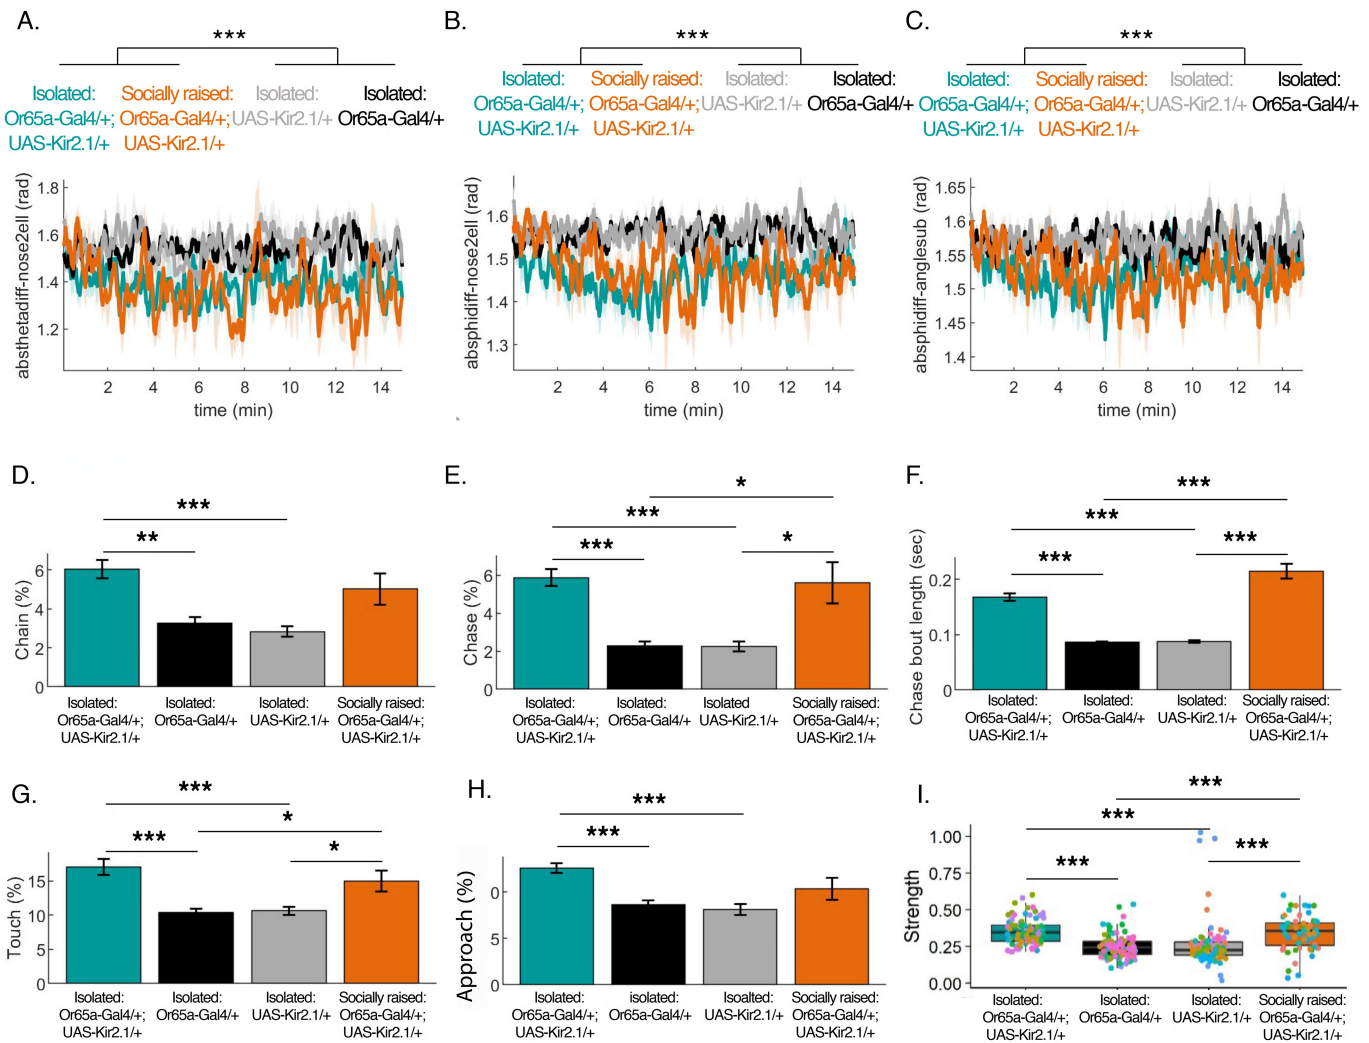

937

938 **Figure S7. Socially raised and isolated Or65a-Gal4/+; UAS-Kir2.1/+ male flies display similarities in group behavior**  
 939 **compared to isolated genetic controls.** A-C: Per-frame averages of three kinetic features (A: absthetaadiff\_nose2ell, B:  
 940 absphidiff\_nose2ell, C: absphidiff\_anglesub) in socially raised (orange) and isolated (blue) Or65a-Gal4/+; UAS-Kir2.1/+ flies  
 941 compared to socially isolated genetic controls (black and gray). D-H: Average percentage of time socially raised (orange) and  
 942 isolated (blue) Or65a-Gal4/+; UAS-Kir2.1/+ male flies performed chain, chase, chase bout length, touch and interaction  
 943 behaviors compared with socially isolated genetic controls (black and gray). I: Per-fly network strength of socially raised  
 944 (orange) and isolated (blue) Or65a-Gal4/+; UAS-Kir2.1/+ male flies compared to socially isolated genetic controls (black and  
 945 gray). One-way ANOVA with Bonferroni post hoc test for normally distributed parameters or Kruskal Wallis followed by  
 946 Wilcoxon signed-rank test for non-normally distributed parameters. FDR correction for multiple testing was performed for all  
 947 analyses. N=6, \* P<0.05, \*\* P<0.01, \*\*\* P<0.001. Error bars signify SEM.

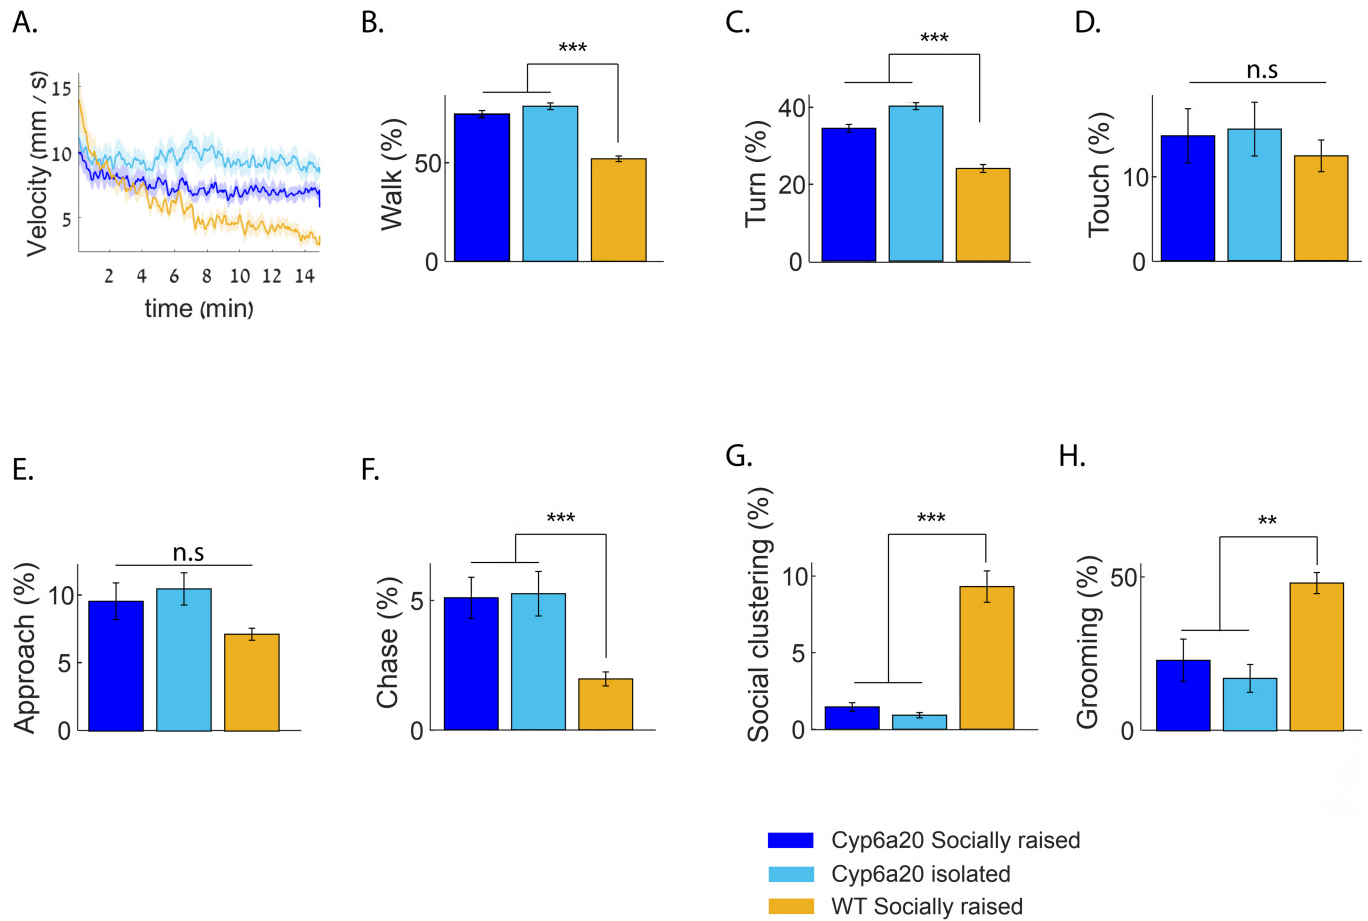

948

949

950 **Figure S8. Cyp6a20 knock-down eliminates the effect of social experience on behavior in a group.** A. Average velocity per  
951 frame of groups composed of 10 socially raised (blue) or isolated (light blue) Cyp6a20-Gal4/+; UAS-Cyp6a20-RNAi flies  
952 compared with 10 WT socially raised (orange) flies. B-H. Average percentage of time socially raised vs. isolated Cyp6a20-  
953 Gal4/+; UAS-Cyp6a20-RNAi and compared with 10 WT socially raised flies spent in walk (B), turn (C), touch (D), approach  
954 (E), chase (F), social clustering (G) and grooming (H) behaviors. Wilcoxon test. N=9. \*\*P<0.01, \*\*\*P<0.001.



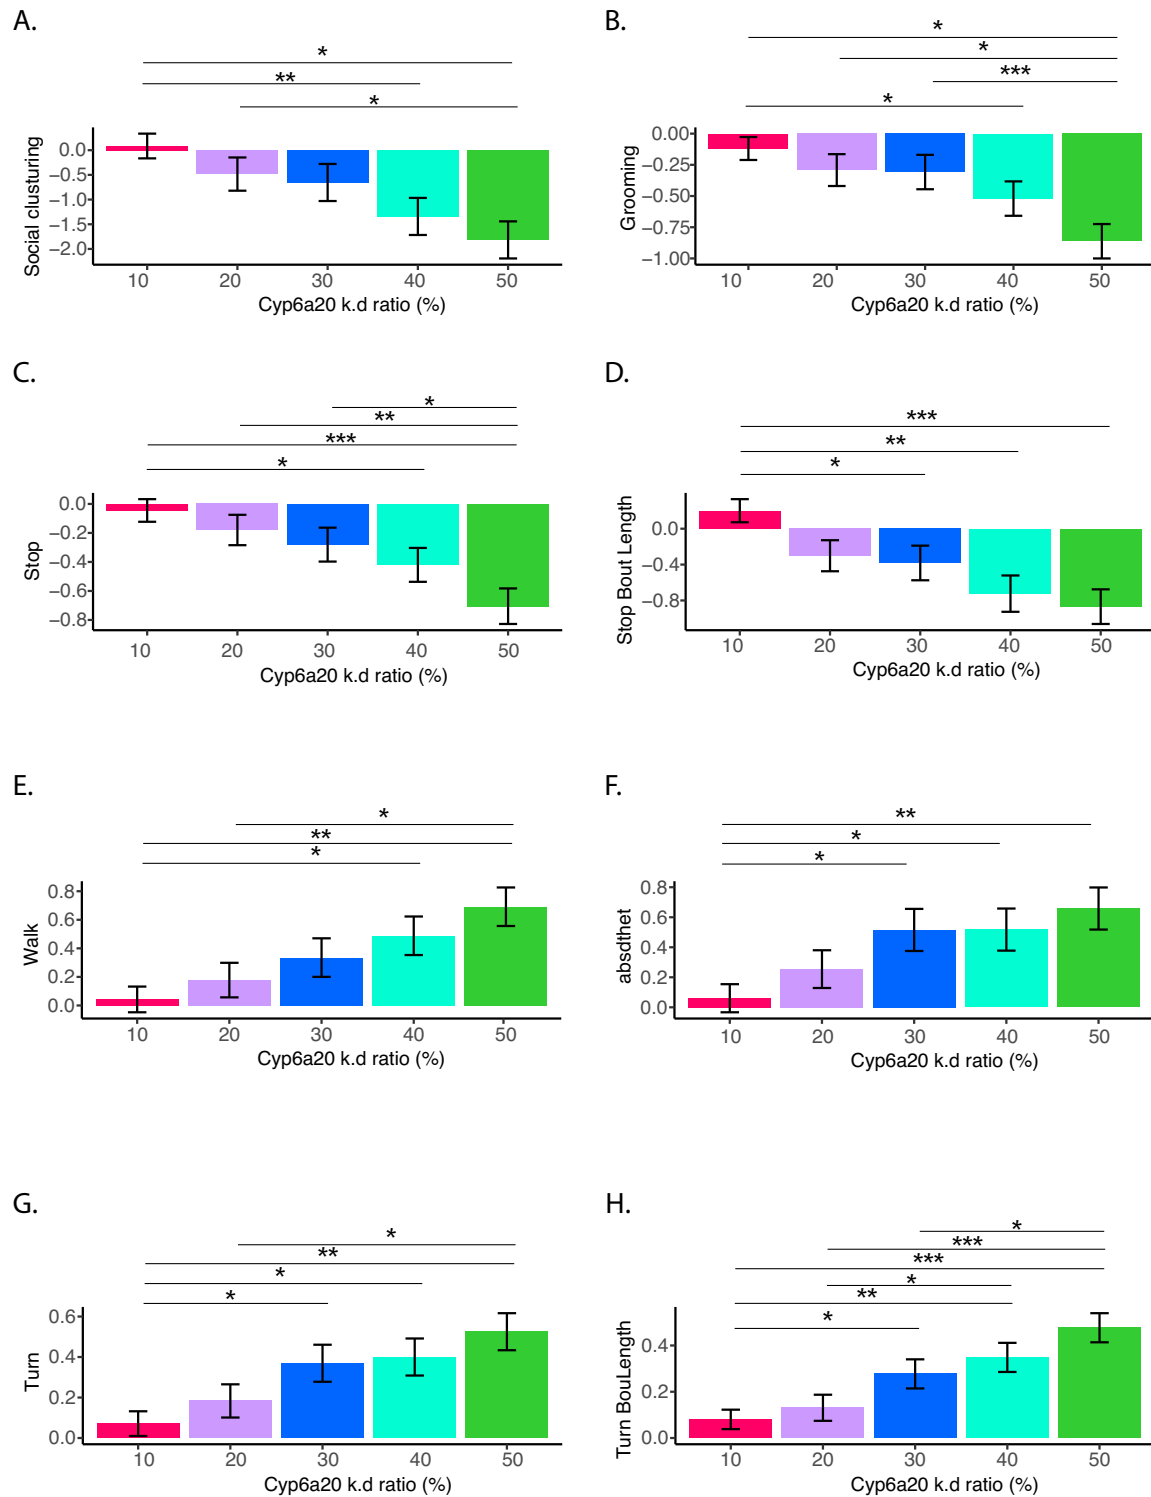

955 **Figure S9. Sub populations in a group affect specific features within behavioral group signatures.** A-H: log2 transformed  
 956 averages of gradually decreasing behavioral features (A: Social clustering, B: Grooming, C: Stop, D: Stop bout length) and  
 957 gradually increasing features (E: Walk, F: absdtheta, G: Turn, H: Turn bout length) in groups composed of 10%-50% isolated  
 958 Cyp6a20-Gal-4/+; UAS-Cyp6a20-RNAi to socially raised WT flies. To compare log-ratios of means (test/control), all values  
 959 were log2-transformed and differences between mean log-values were tested. Specifically, the effect of treatment and mutant  
 960 number on the fraction of each parameter was tested with a linear regression and a 2-way ANOVA was performed on the resulting  
 961 model. Log-ratios between different number of mutants were compared in terms of difference of differences defined with by  
 962 linear contrasts and FDR correction was applied to all comparisons. N=14, 8, and 6 for groups of 10%, 20-30% and 40-50%,  
 963 respectively, \* P<0.05, \*\* P<0.01, \*\*\* P<0.001. Error bars signify SEM.
